# Supplementary material
Source: publisher figshare collection journal article supplement (https://sage.figshare.com/ndownloader/files/17890163)

Factor correlations:

```
F1
F1 1
> summary(polymodel)
      F1  h2
T60_1  0.508 0.258
T60_6sf 0.581 0.338
T60_8   0.641 0.411
T60_11  0.497 0.247
T60_13sf 0.765 0.586
T60_17  0.508 0.258
T60_21  0.450 0.202
T60_24sf 0.543 0.295
T60_27sf 0.662 0.438
T60_29  0.738 0.544
T60_31  0.841 0.707
T60_34sf 0.901 0.811
T60_37sf 0.913 0.834
T60_40sf 0.808 0.653
T60_43sf 0.723 0.523
T60_45  0.584 0.341
T60_48sf 0.834 0.696
T60_51  0.522 0.273
T60_54sf 0.851 0.724
T60_56  0.570 0.325
```

SS loadings: 9.464  
Proportion Var: 0.473

Factor correlations:

```
F1
F1 1Factor correlations:
```

```
F1
F1 1
> summary(polymodel)
      F1  h2
T60_1  0.508 0.258
T60_6sf 0.581 0.338
T60_8   0.641 0.411
T60_11  0.497 0.247
T60_13sf 0.765 0.586
T60_17  0.508 0.258
T60_21  0.450 0.202
T60_24sf 0.543 0.295
T60_27sf 0.662 0.438
T60_29  0.738 0.544
```

T60\_31 0.841 0.707  
 T60\_34sf 0.901 0.811  
 T60\_37sf 0.913 0.834  
 T60\_40sf 0.808 0.653  
 T60\_43sf 0.723 0.523  
 T60\_45 0.584 0.341  
 T60\_48sf 0.834 0.696  
 T60\_51 0.522 0.273  
 T60\_54sf 0.851 0.724  
 T60\_56 0.570 0.325

SS loadings: 9.464  
 Proportion Var: 0.473

Factor correlations:

F1  
 F1 1

```

> itemfit(polymodel, 'S_X2', na.rm=TRUE)
  item  S_X2 df.S_X2 p.S_X2
1  T60_1 75.934   93 0.901
2  T60_6sf 72.647   81 0.735
3  T60_8 120.525   88 0.012
4  T60_11 89.708   99 0.737
5  T60_13sf 89.664   73 0.090
6  T60_17 88.133   99 0.775
7  T60_21 83.119  101 0.902
8  T60_24sf 71.994   74 0.544
9  T60_27sf 65.034   87 0.962
10 T60_29 81.377   79 0.405
11 T60_31 63.349   61 0.394
12 T60_34sf 53.242   49 0.314
13 T60_37sf 49.363   44 0.267
14 T60_40sf 52.891   65 0.859
15 T60_43sf 52.490   61 0.773
16 T60_45 62.716   84 0.960
17 T60_48sf 44.989   51 0.710
18 T60_51 81.371   95 0.839
19 T60_54sf 40.667   47 0.731
20 T60_56 83.547   96 0.814
>
> coef(polymodel, IRTpars = T) ##COEFFICIENTS
$T60_1
  a  b1  b2  b3
par 1.004 -1.101 0.863 2.834

$T60_6sf
  a  b1  b2  b3

```

par 1.216 -2.48 -0.554 1.032

\$T60\_8

a b1 b2 b3

par 1.423 -1.153 0.099 1.247

\$T60\_11

a b1 b2 b3

par 0.975 -1.07 0.573 2.534

\$T60\_13sf

a b1 b2 b3

par 2.024 -1.053 0.279 1.575

\$T60\_17

a b1 b2 b3

par 1.003 -1.417 0.494 1.932

\$T60\_21

a b1 b2 b3

par 0.857 -2.072 0.345 2.231

\$T60\_24sf

a b1 b2 b3

par 1.1 -0.083 1.555 3.27

\$T60\_27sf

a b1 b2 b3

par 1.502 -0.832 0.58 1.736

\$T60\_29

a b1 b2 b3

par 1.86 -0.884 0.209 1.293

\$T60\_31

a b1 b2 b3

par 2.643 -0.949 0.405 1.469

\$T60\_34sf

a b1 b2 b3

par 3.525 -0.241 0.784 1.531

\$T60\_37sf

a b1 b2 b3

par 3.818 -0.188 0.921 1.718

\$T60\_40sf

a b1 b2 b3

par 2.334 -0.44 0.682 1.665

\$T60\_43sf  
a b1 b2 b3  
par 1.781 -0.28 1.133 2.569

\$T60\_45  
a b1 b2 b3  
par 1.224 -0.806 1 2.707

\$T60\_48sf  
a b1 b2 b3  
par 2.576 0.181 1.267 2.175

\$T60\_51  
a b1 b2 b3  
par 1.042 -0.717 1.145 2.703

\$T60\_54sf  
a b1 b2 b3  
par 2.757 0.132 1.275 2.196

\$T60\_56  
a b1 b2 b3  
par 1.182 -1.197 0.381 2.027

\$GroupPars  
MEAN\_1 COV\_11  
par 0 1

>

Test Information and Standard Errors

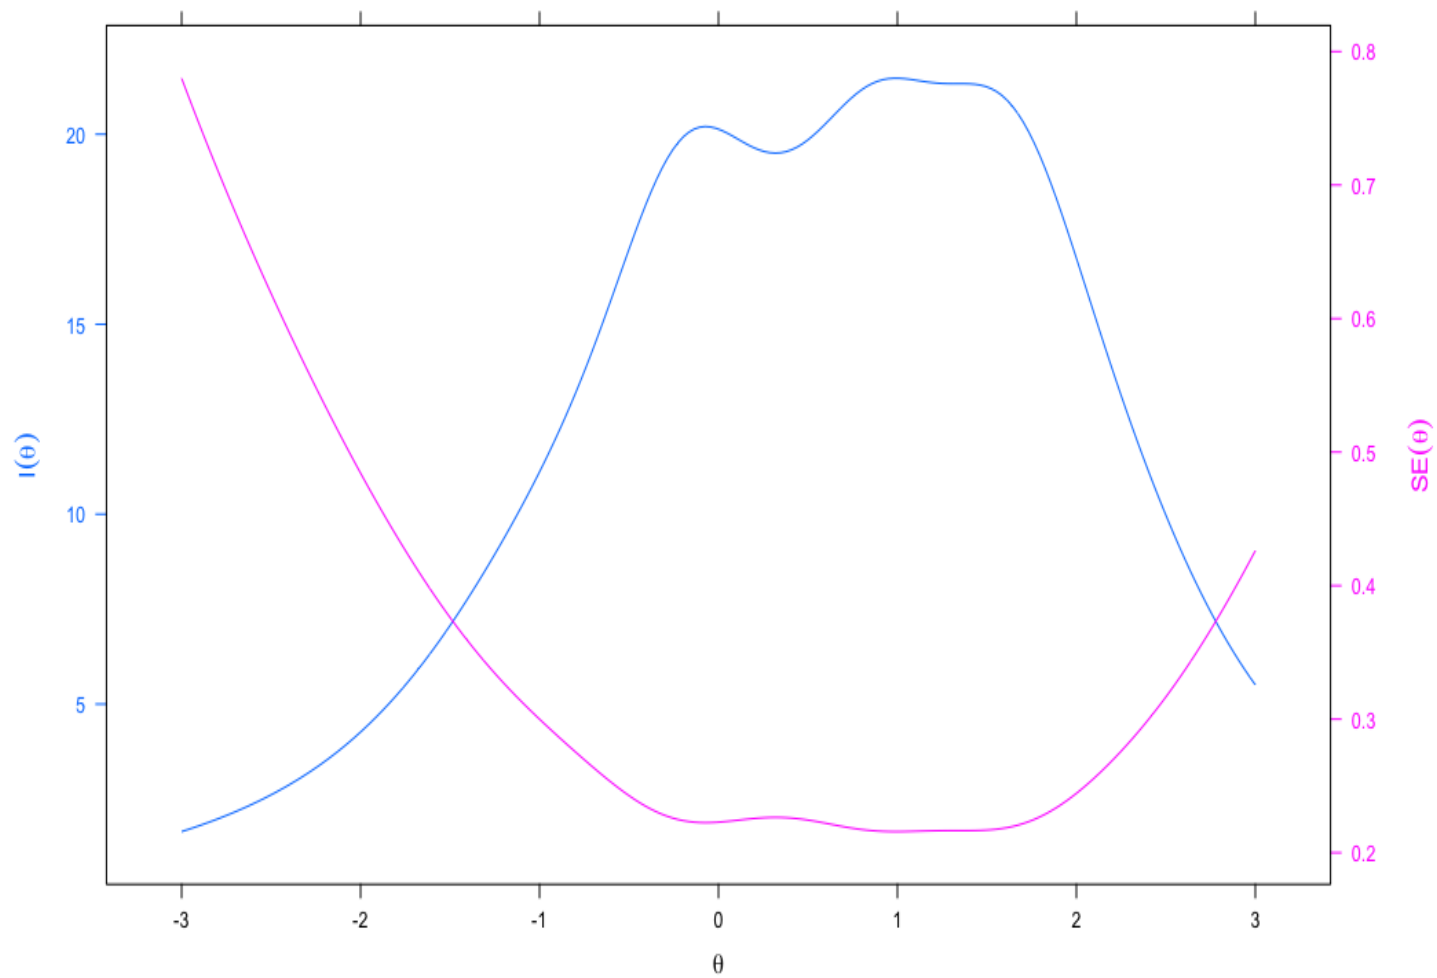

Trace lines and information for item 1

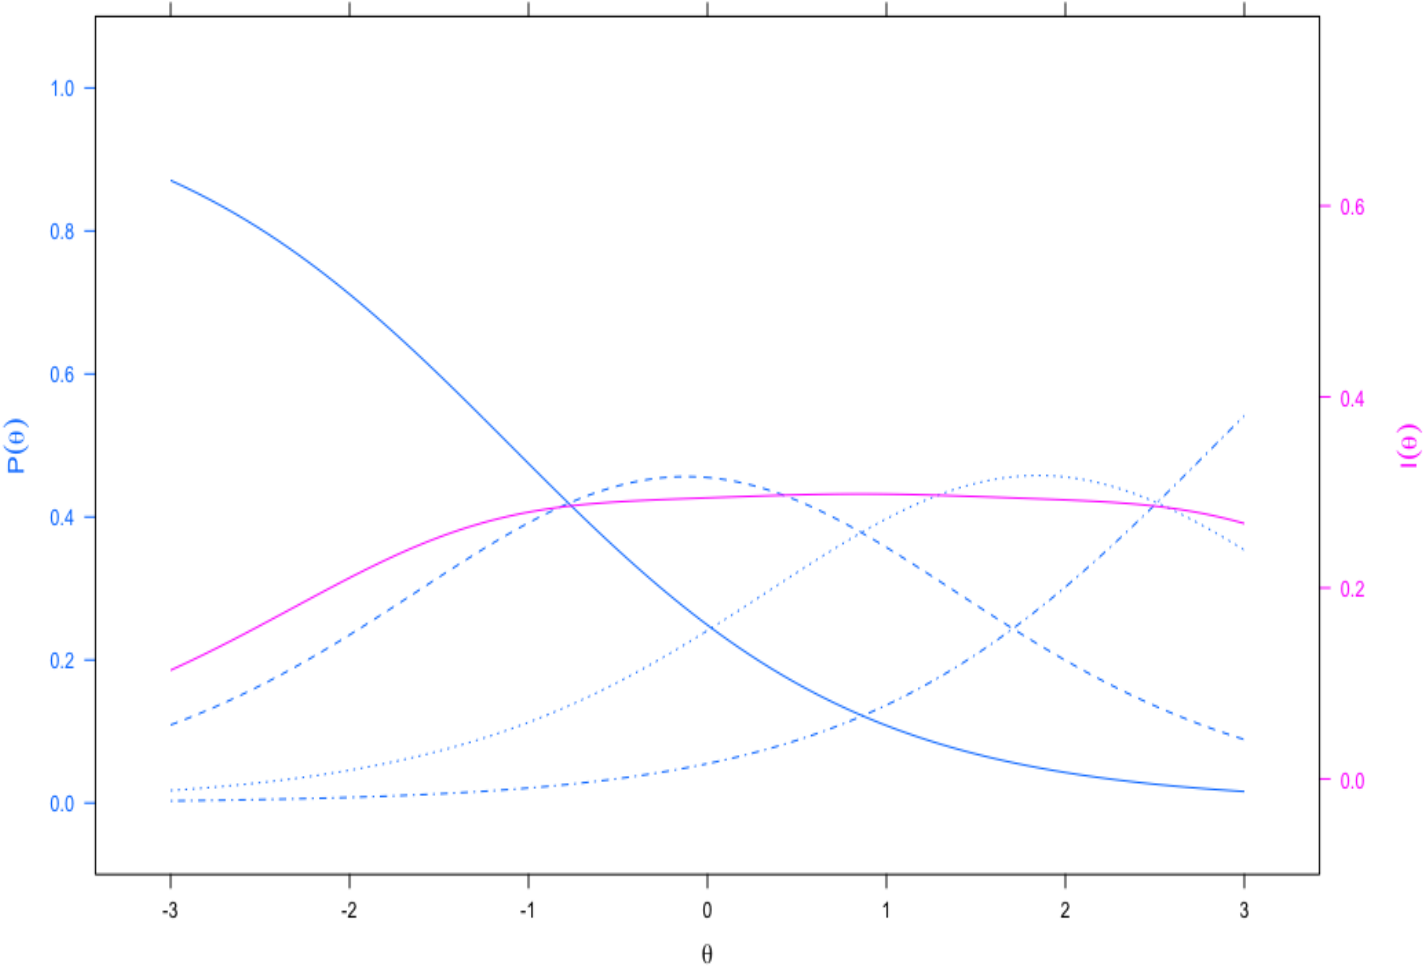

Trace lines and information for item 2

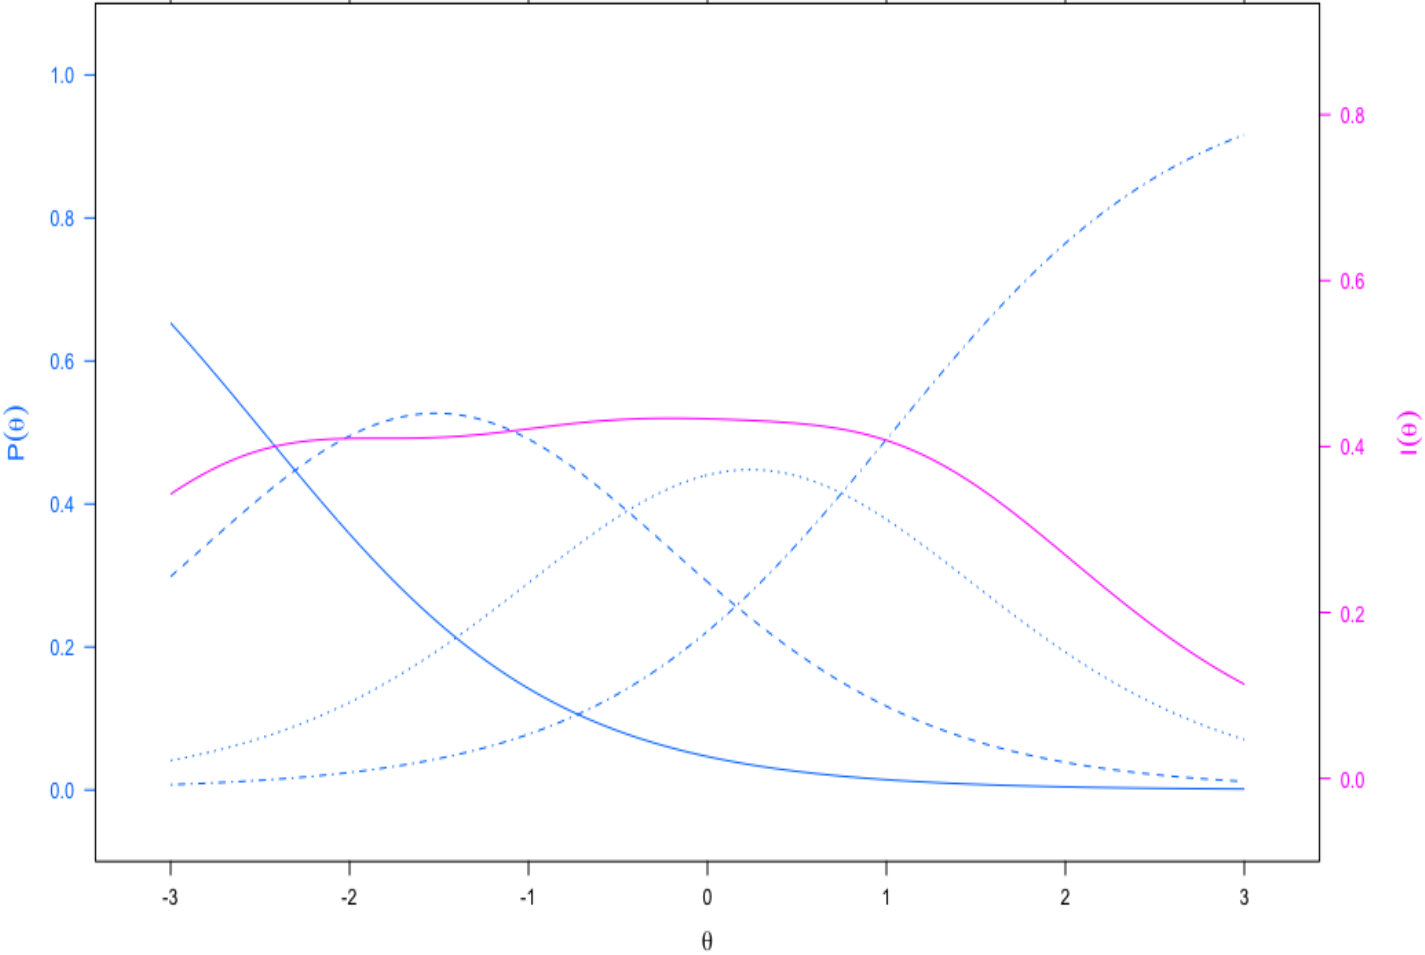

Trace lines and information for item 3

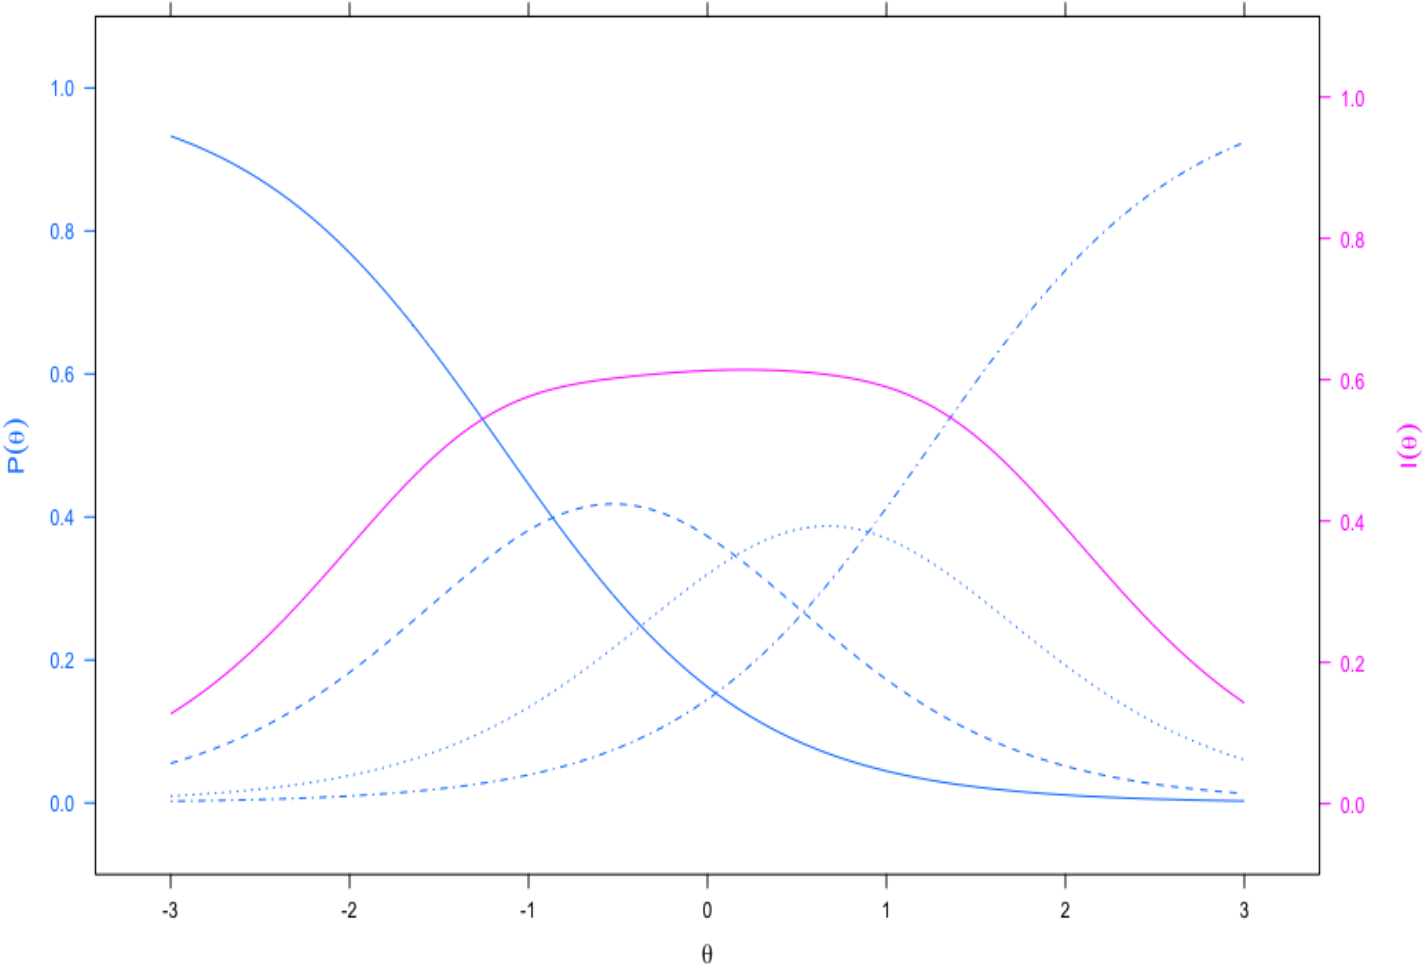



Trace lines and information for item 4

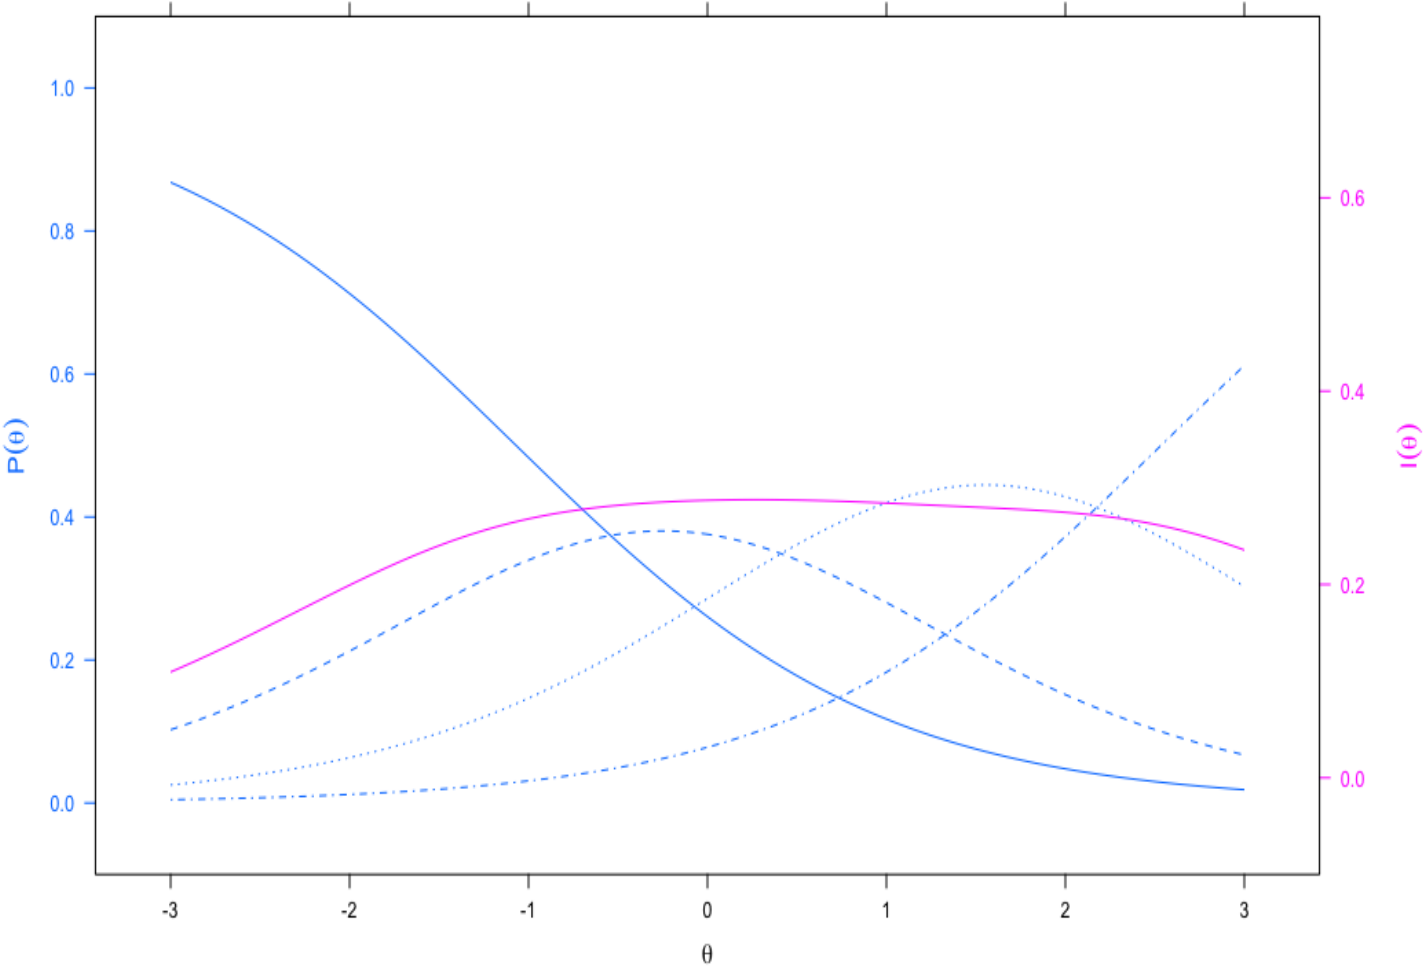

Trace lines and information for item 5

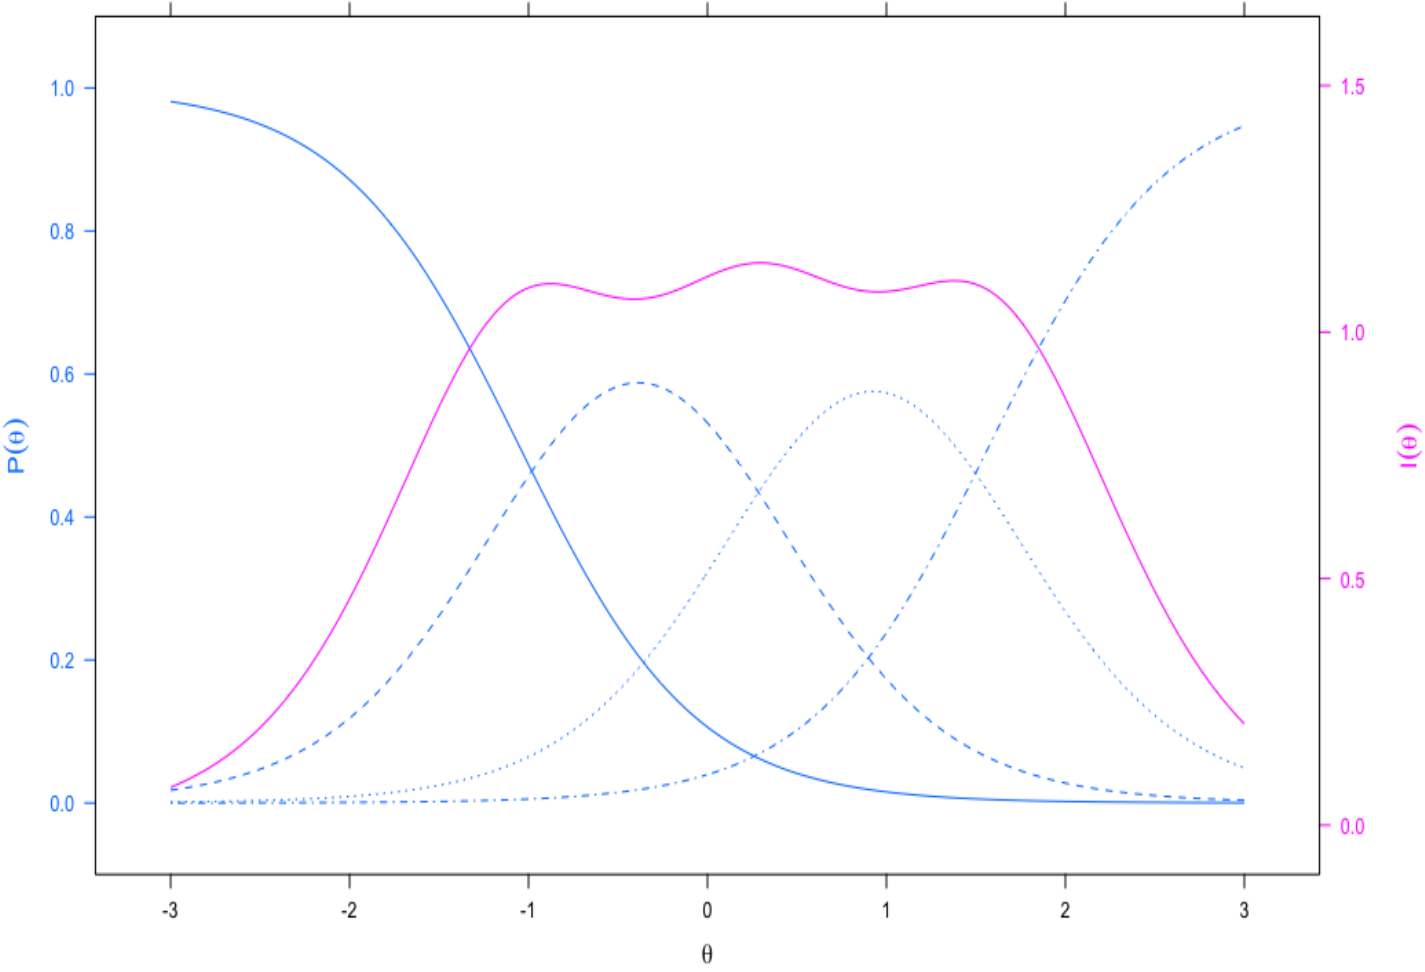

Trace lines and information for item 6

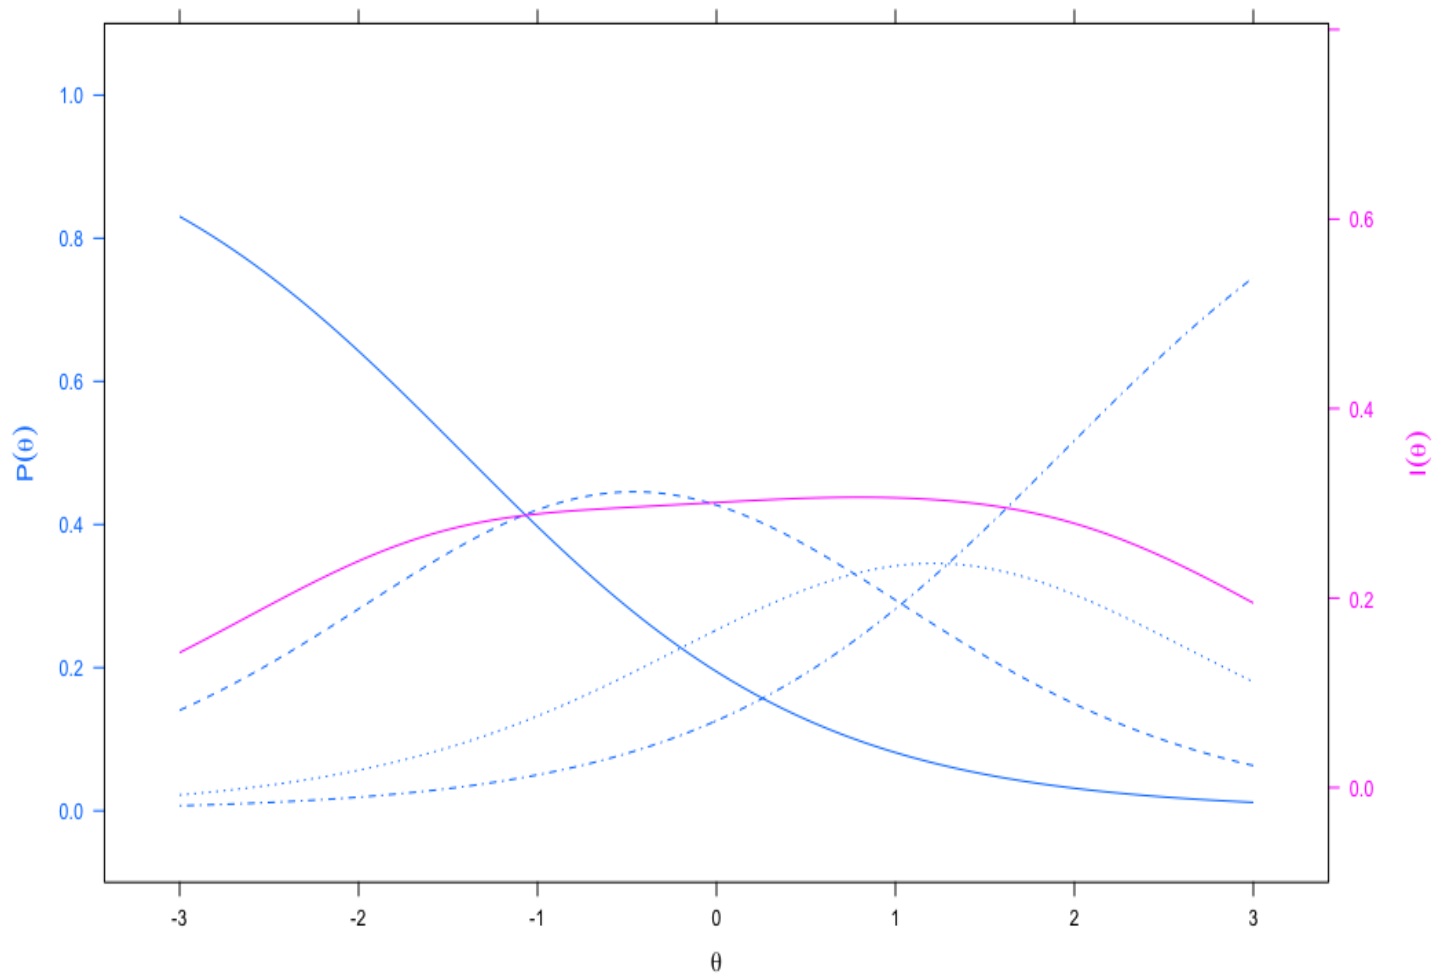

Trace lines and information for item 7

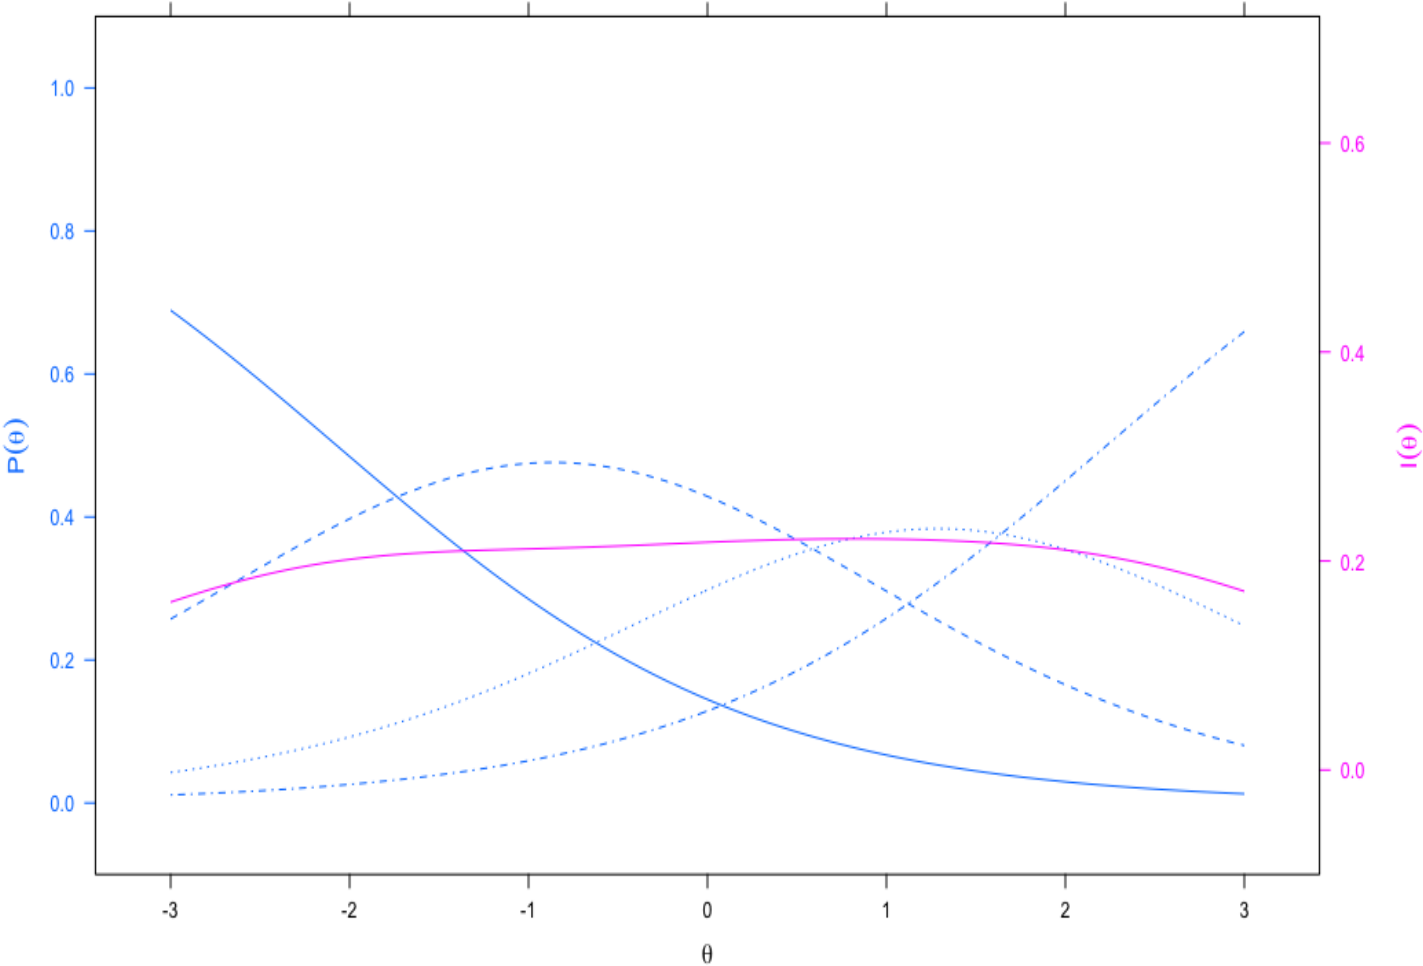

Trace lines and information for item 8

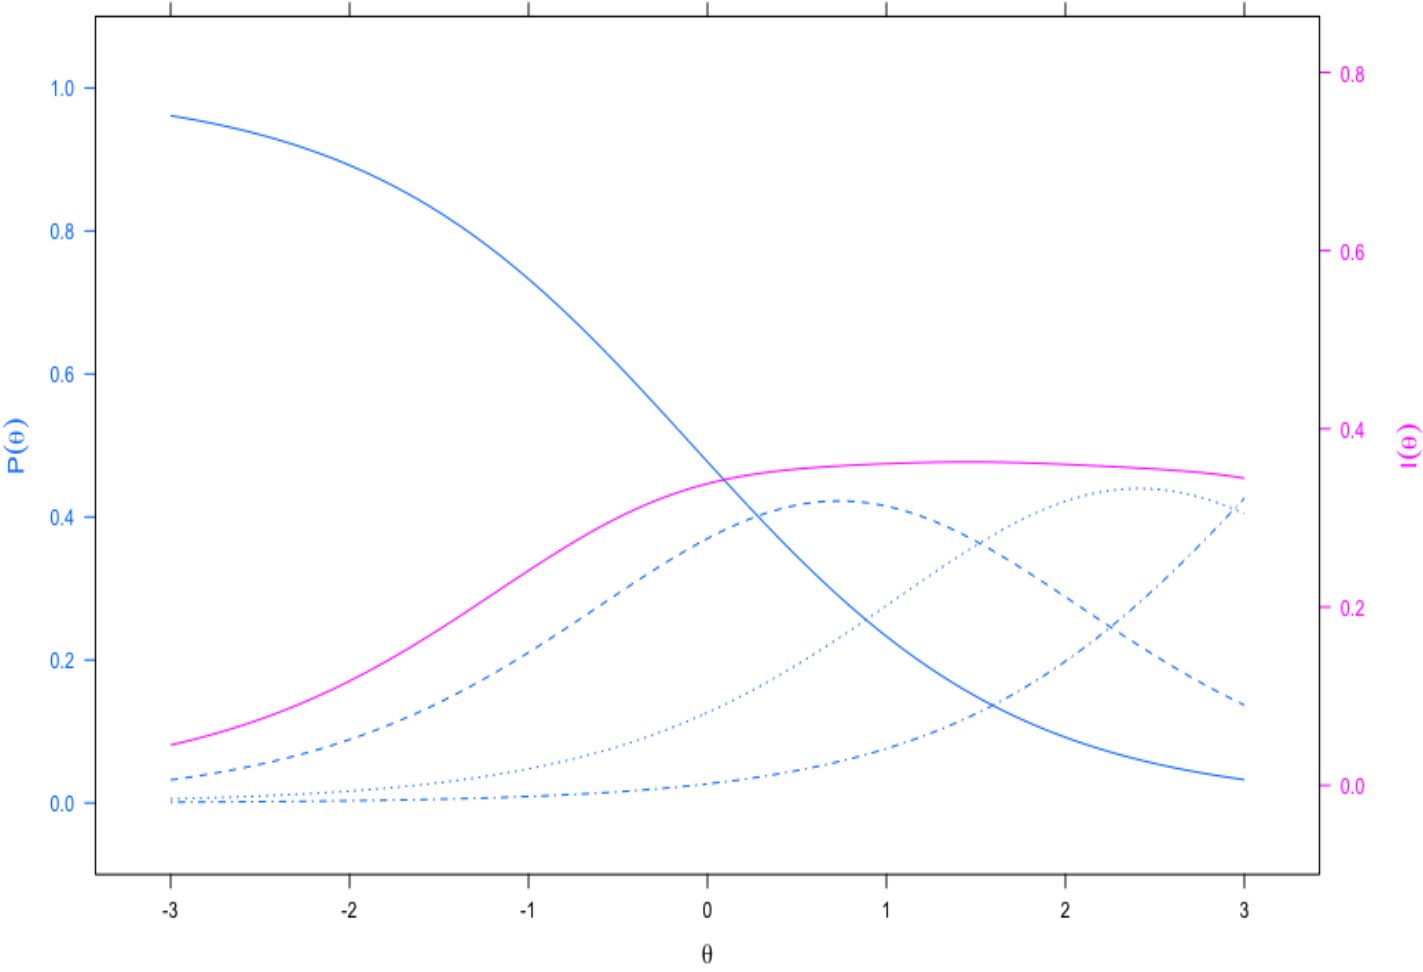

Trace lines and information for item 9

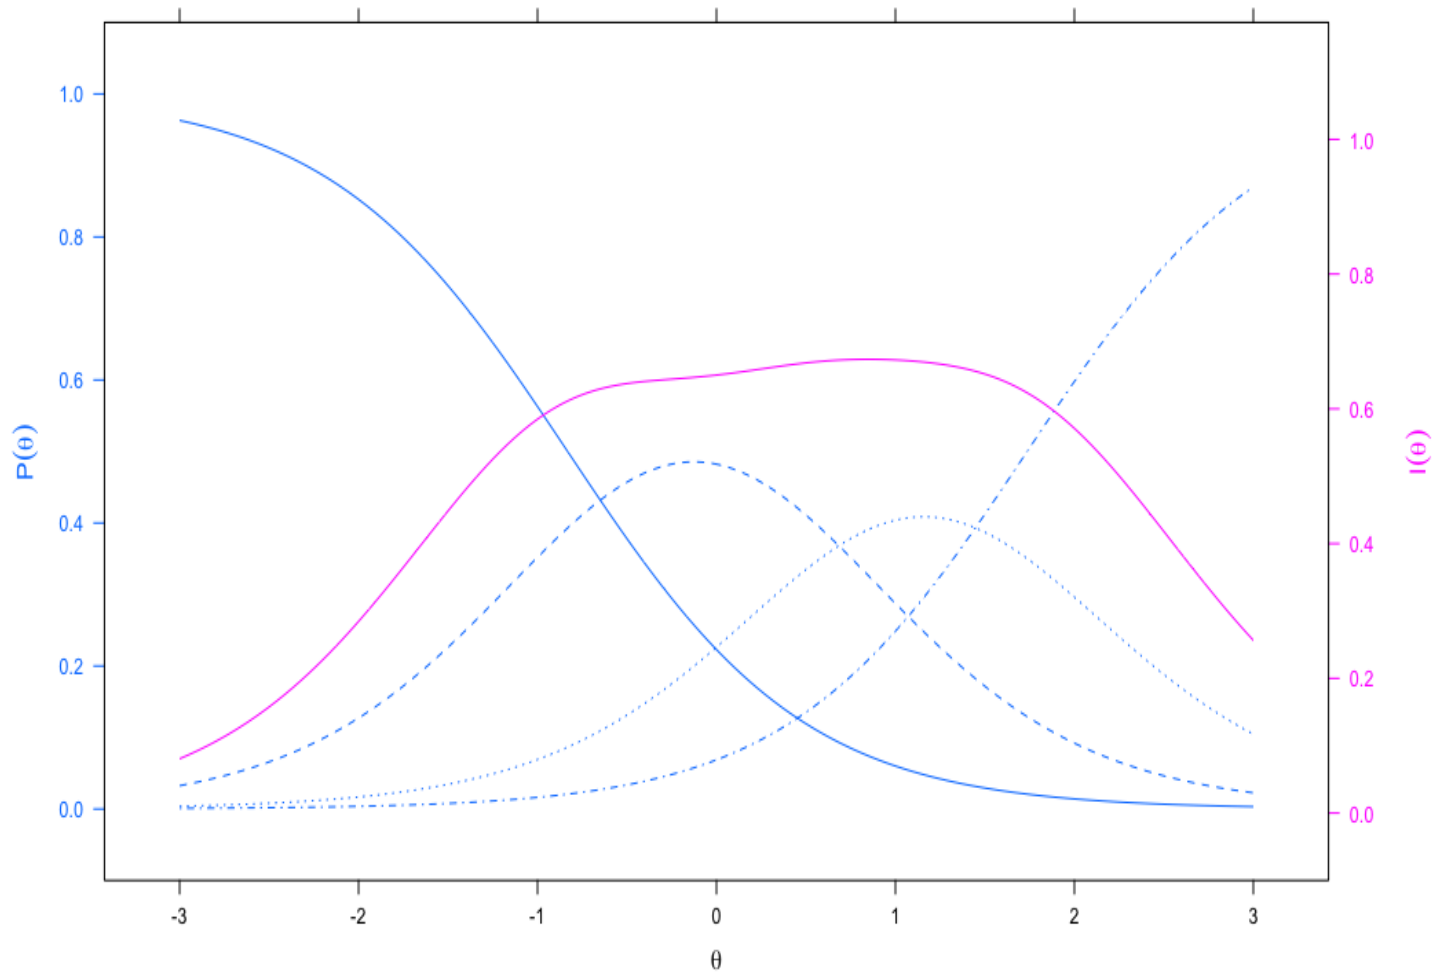

Trace lines and information for item 10

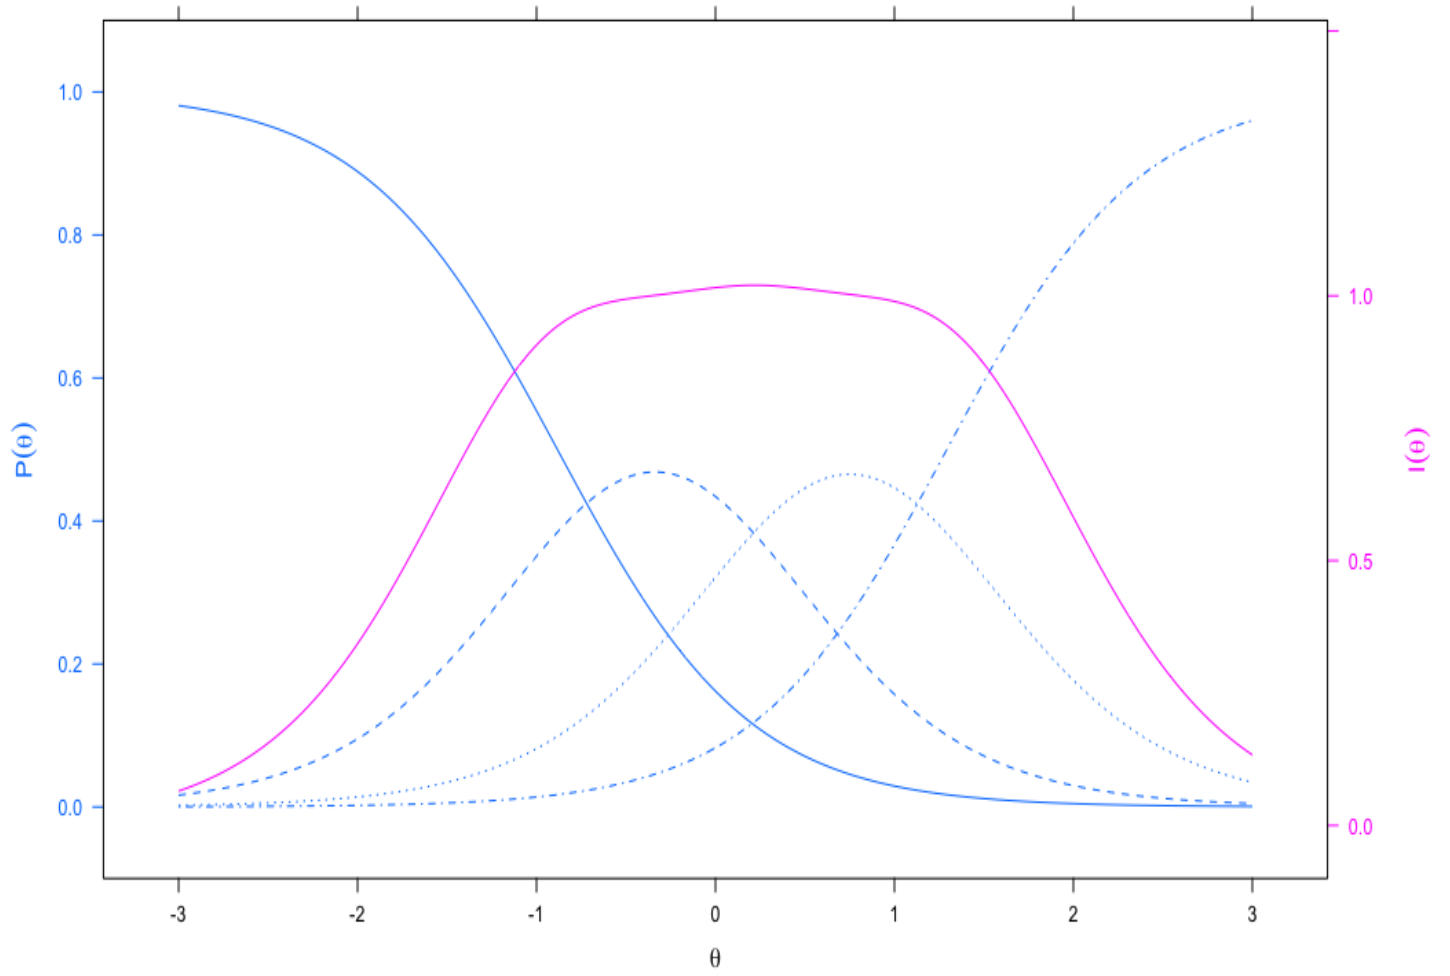

Trace lines and information for item 11

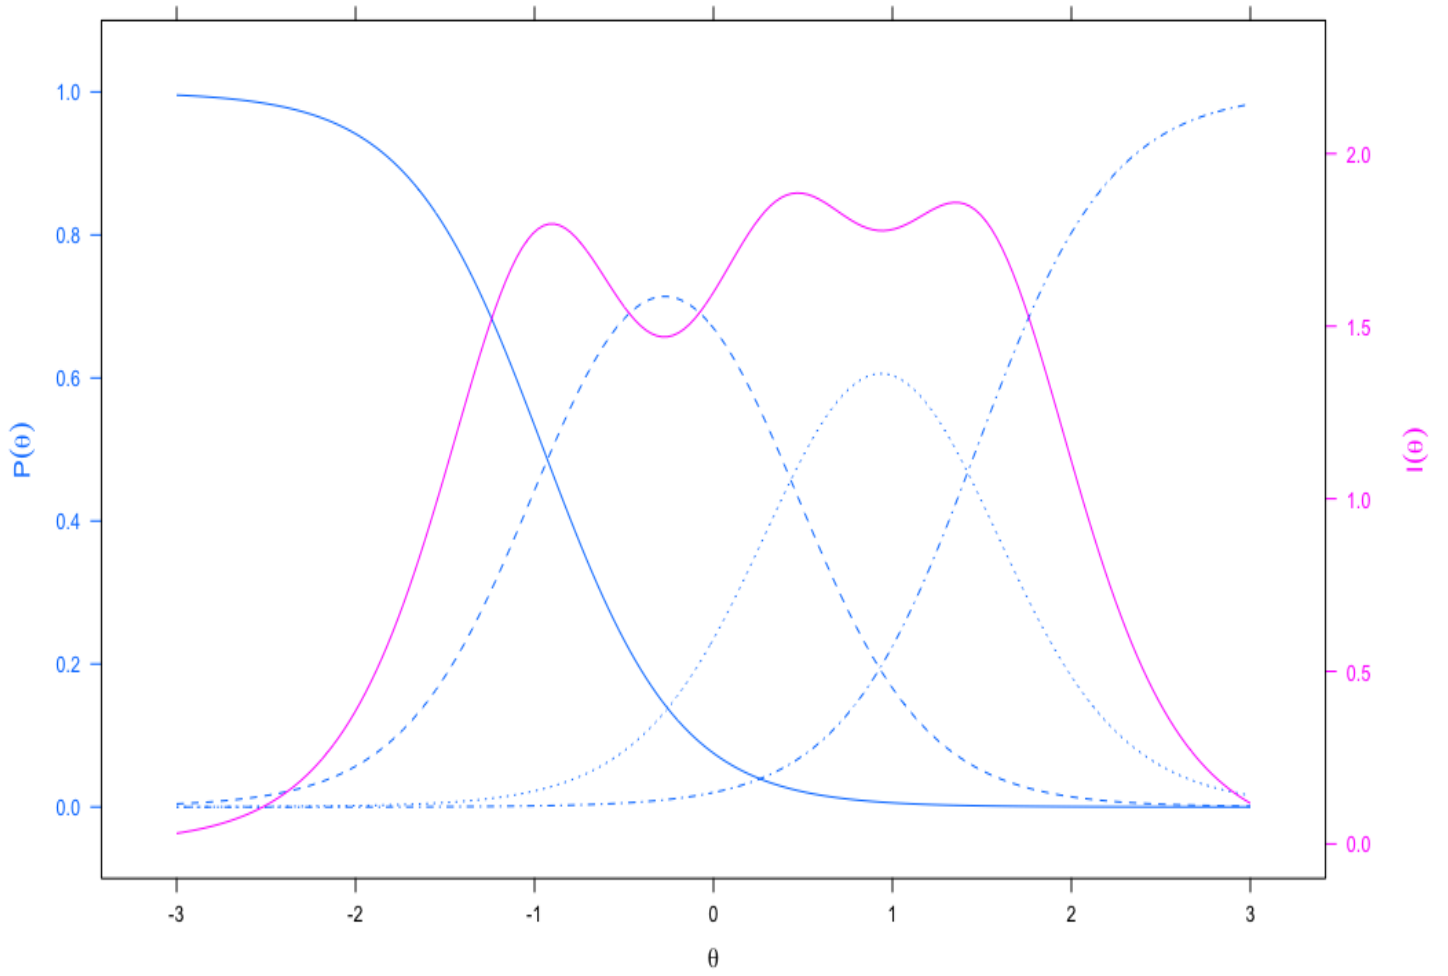



Trace lines and information for item 12

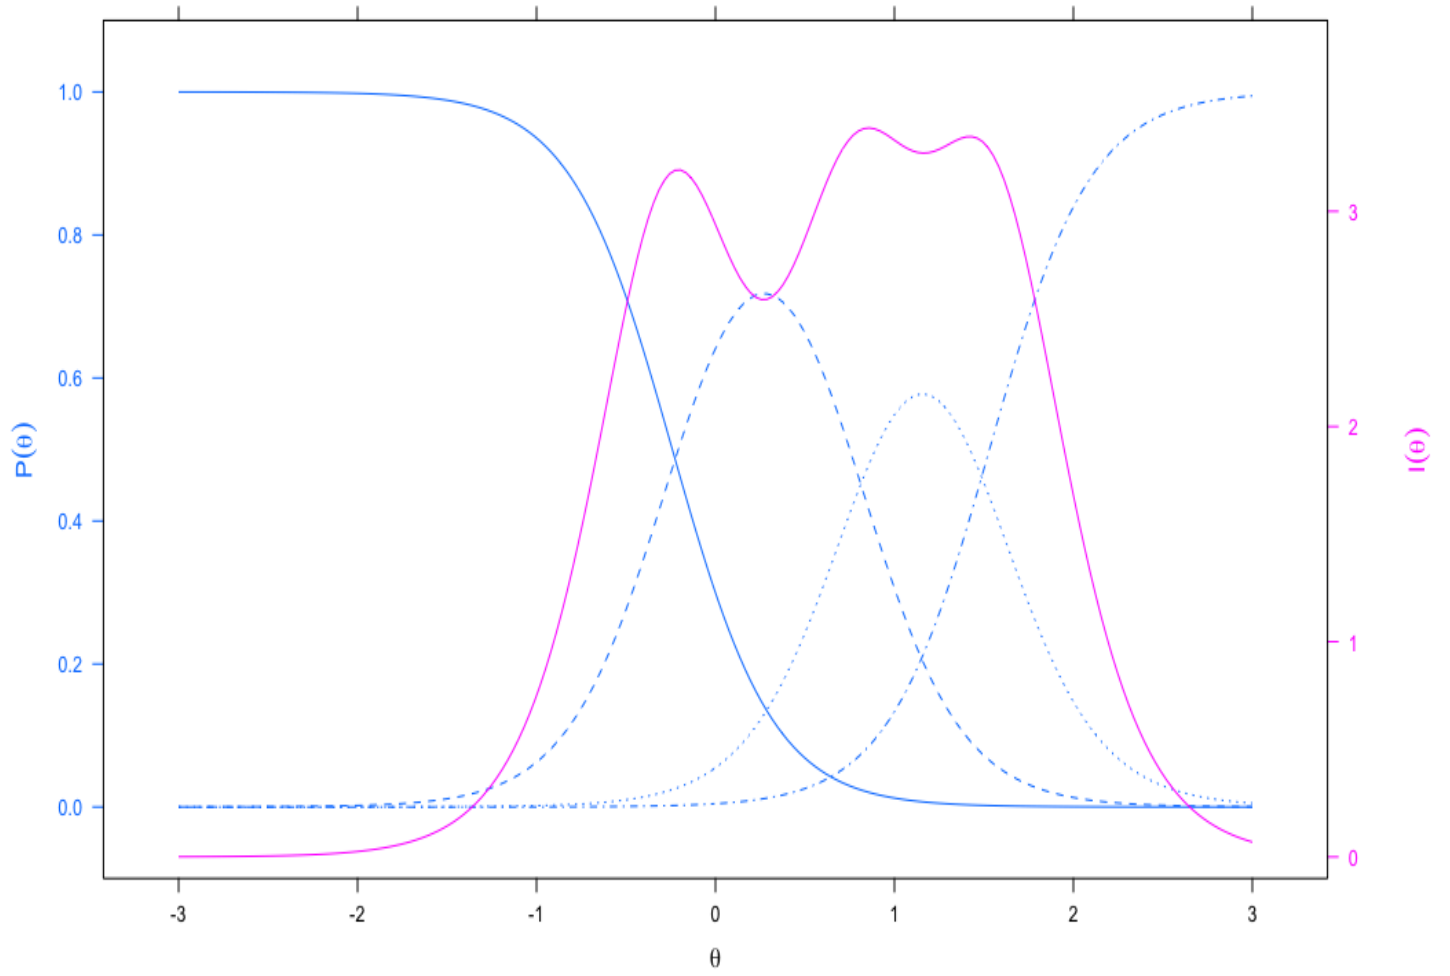

Trace lines and information for item 13

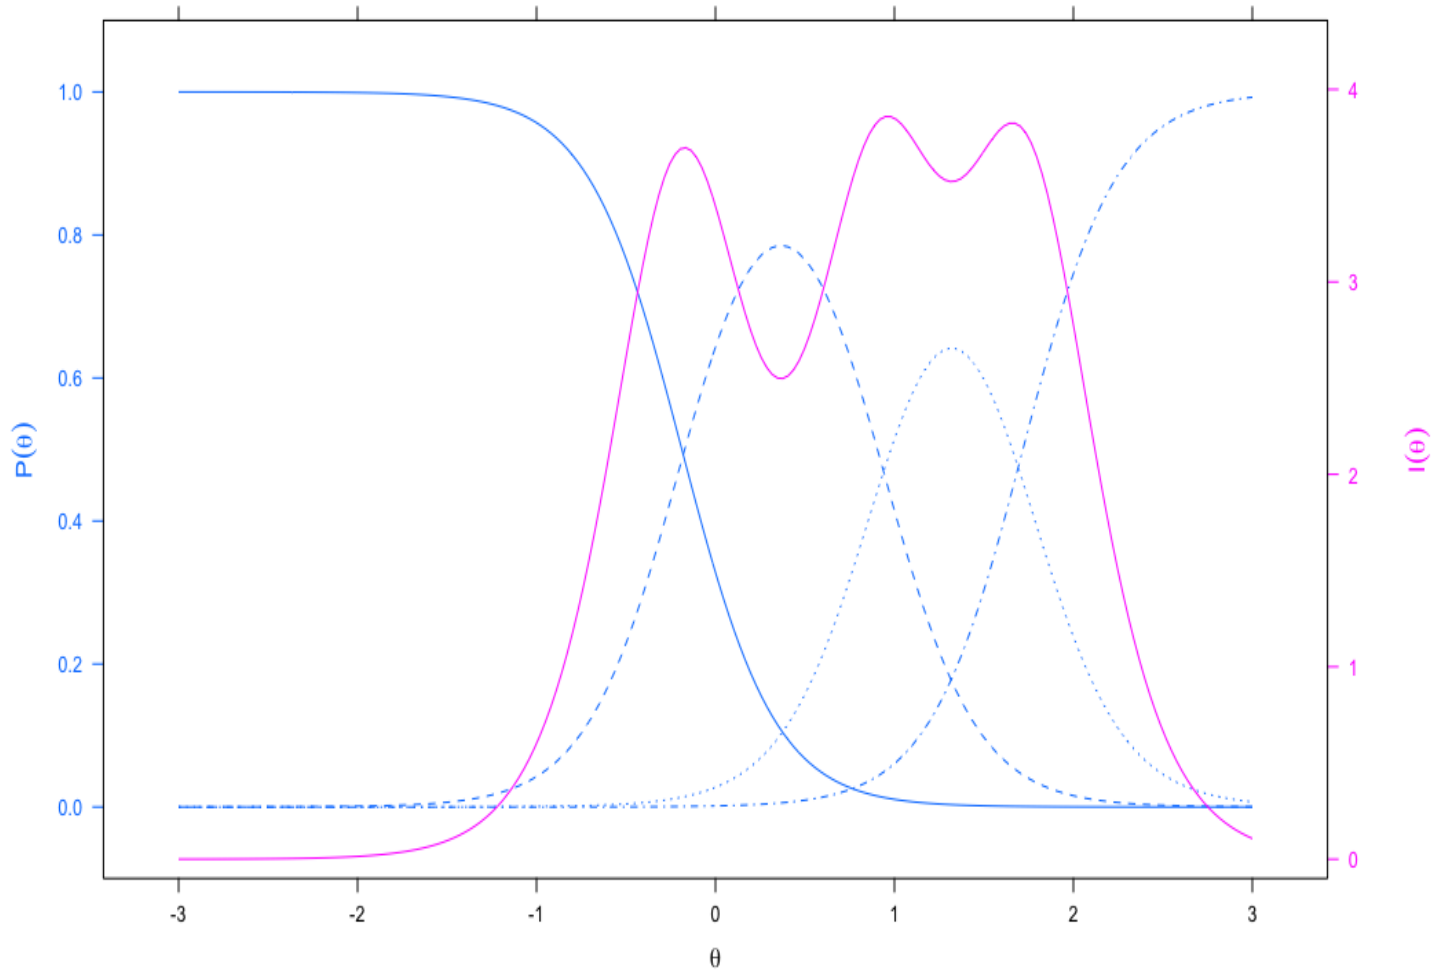

Trace lines and information for item 14

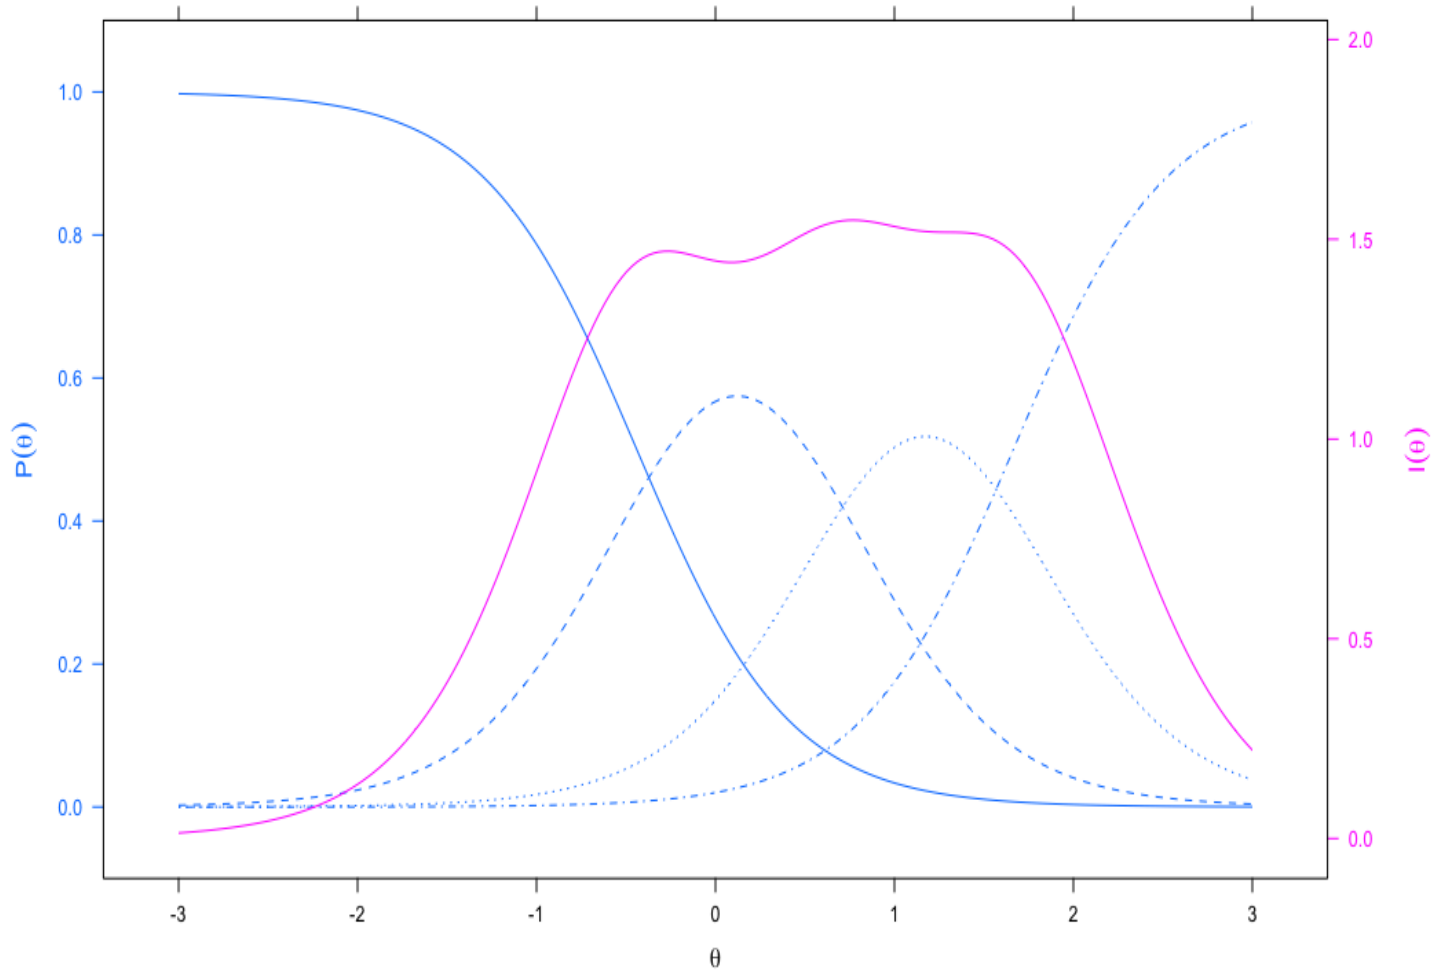

Trace lines and information for item 15

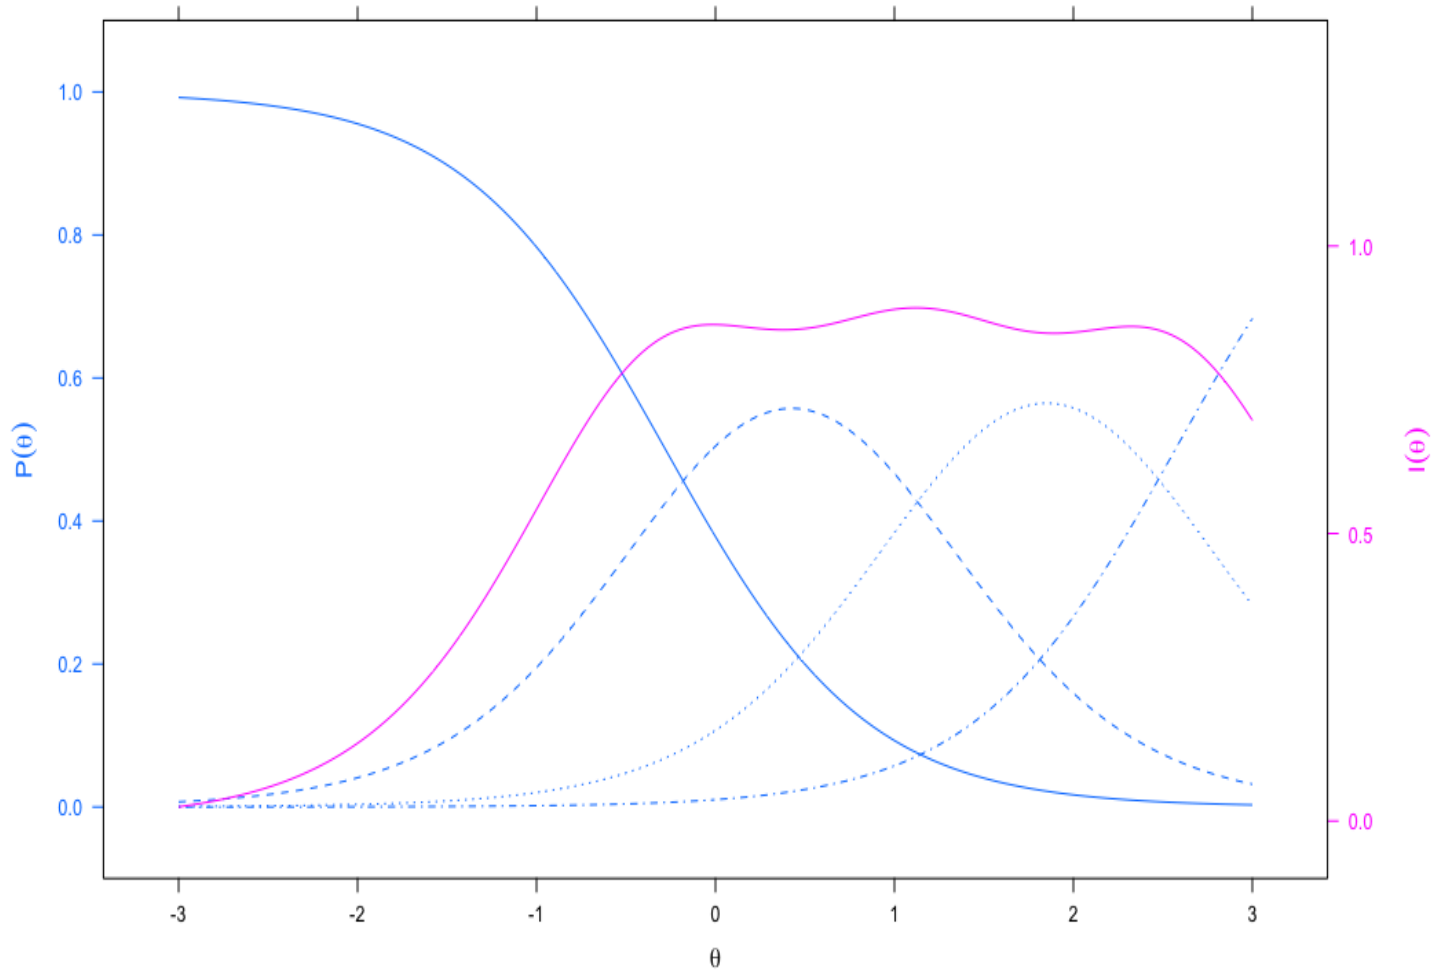

Trace lines and information for item 16

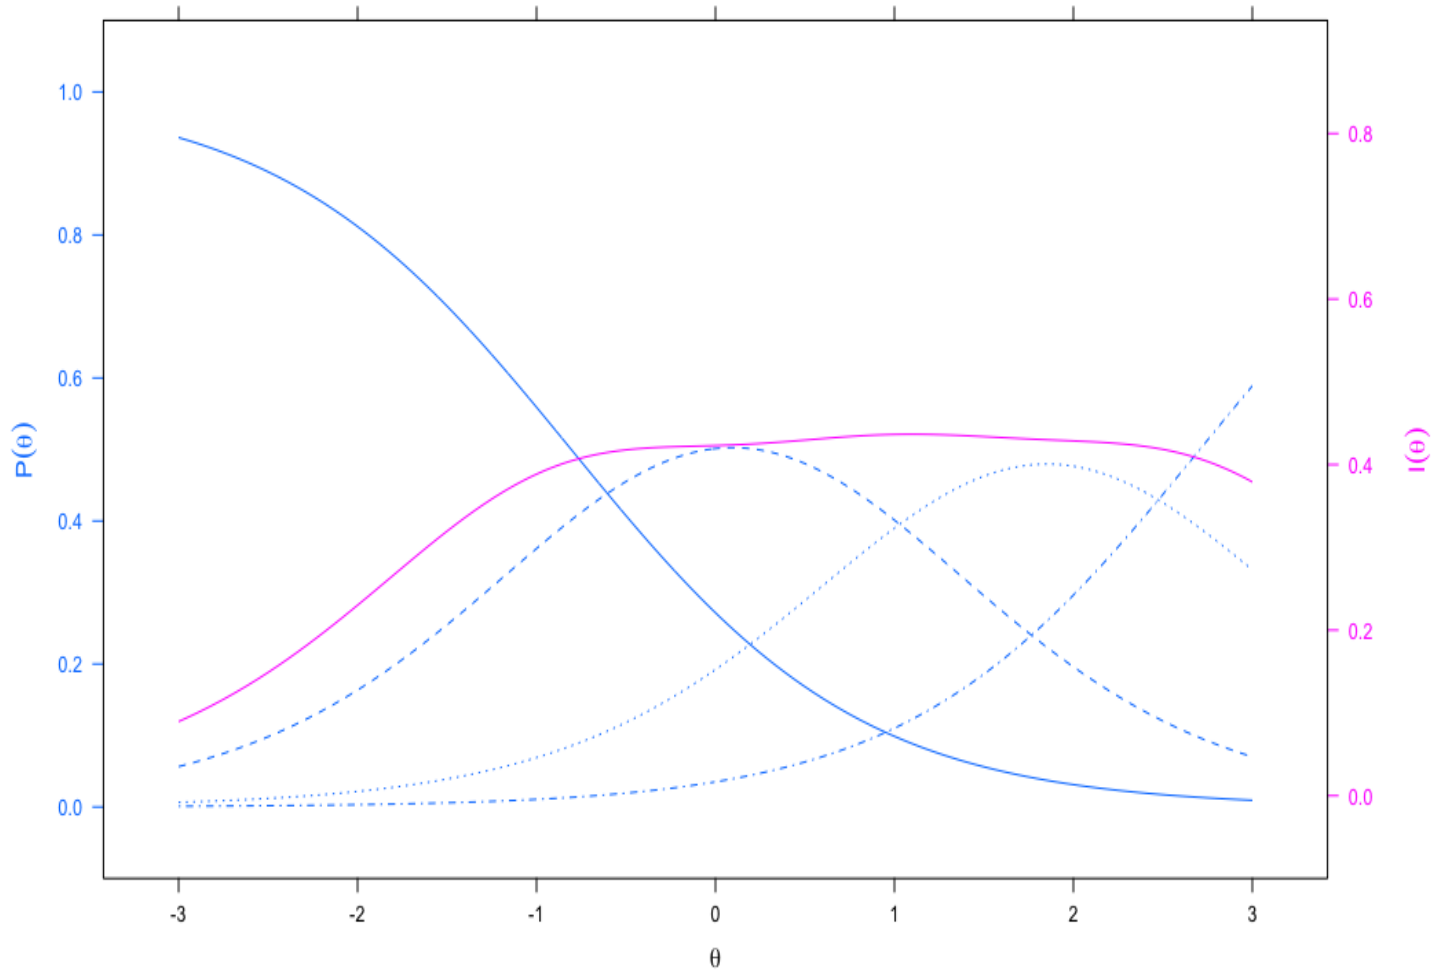

Trace lines and information for item 17

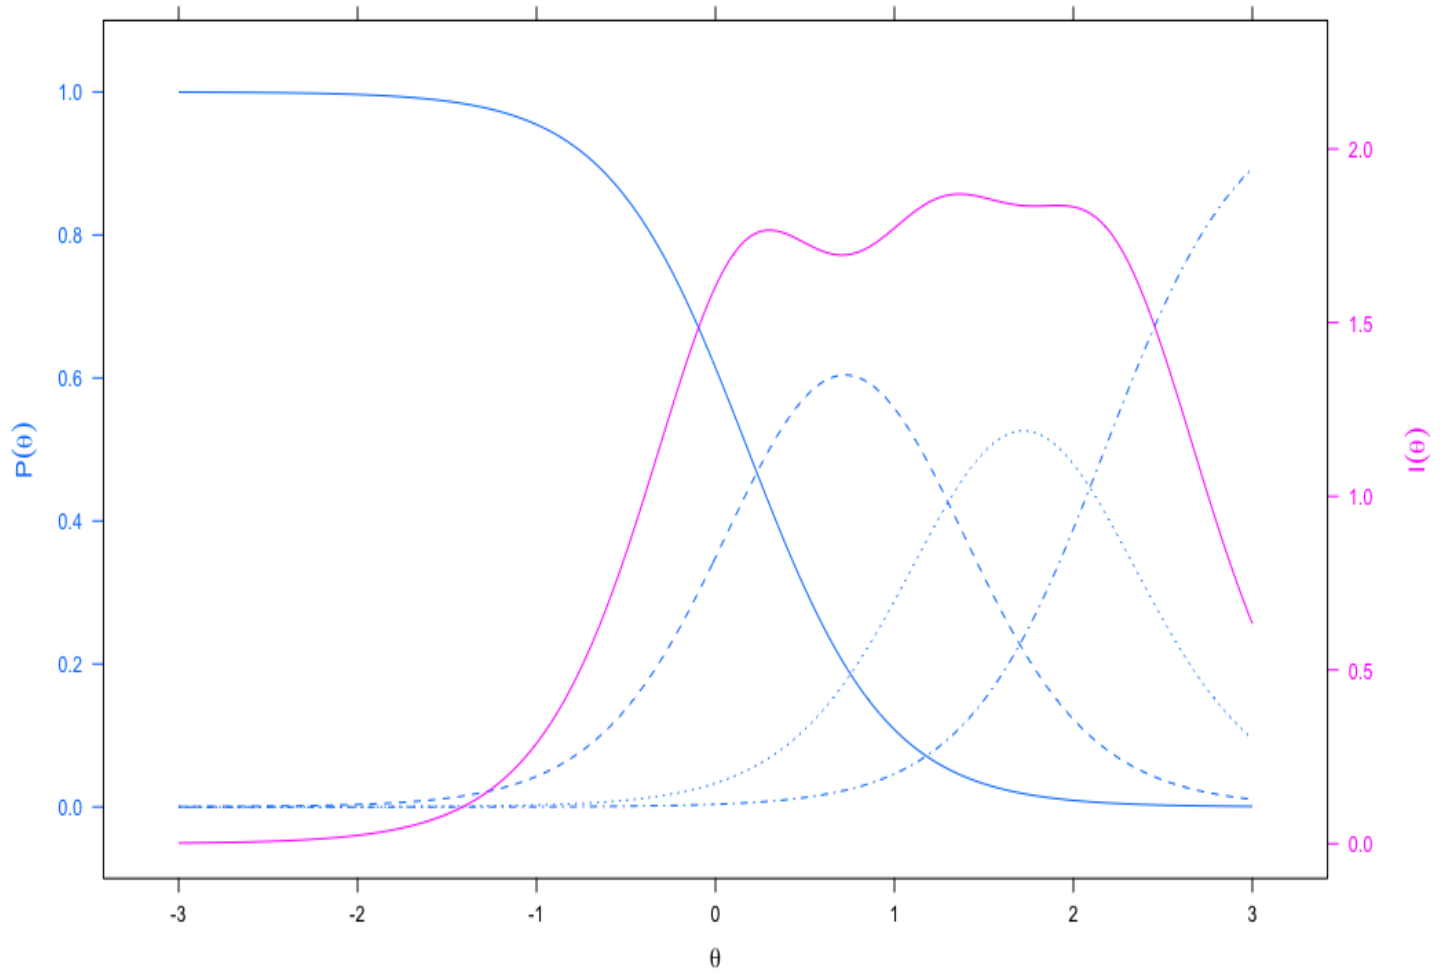

Trace lines and information for item 18

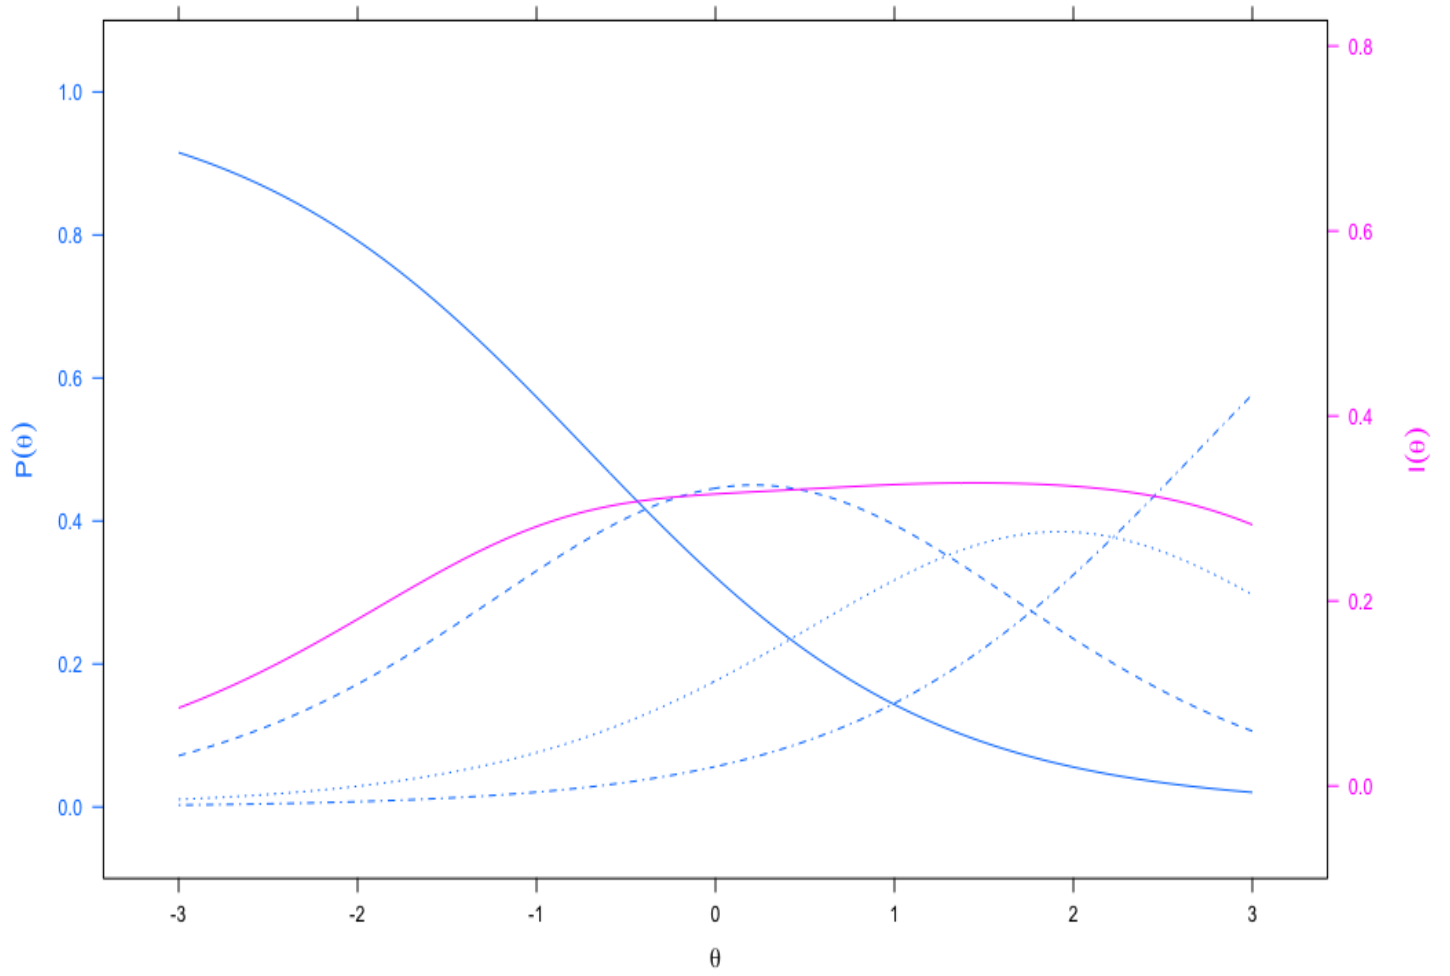

Trace lines and information for item 19

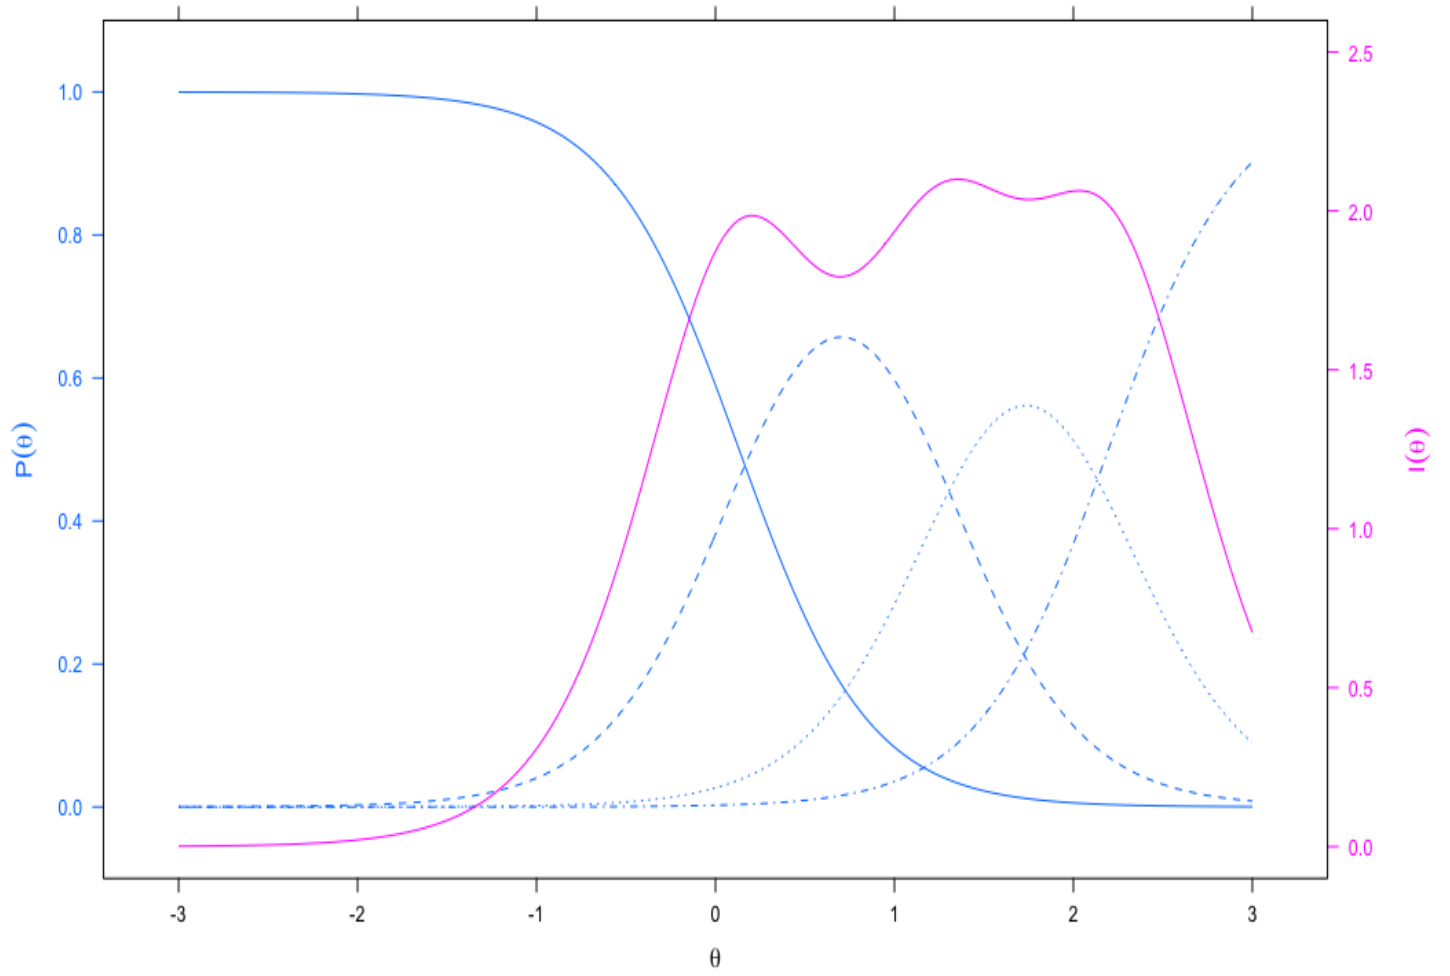



Trace lines and information for item 20

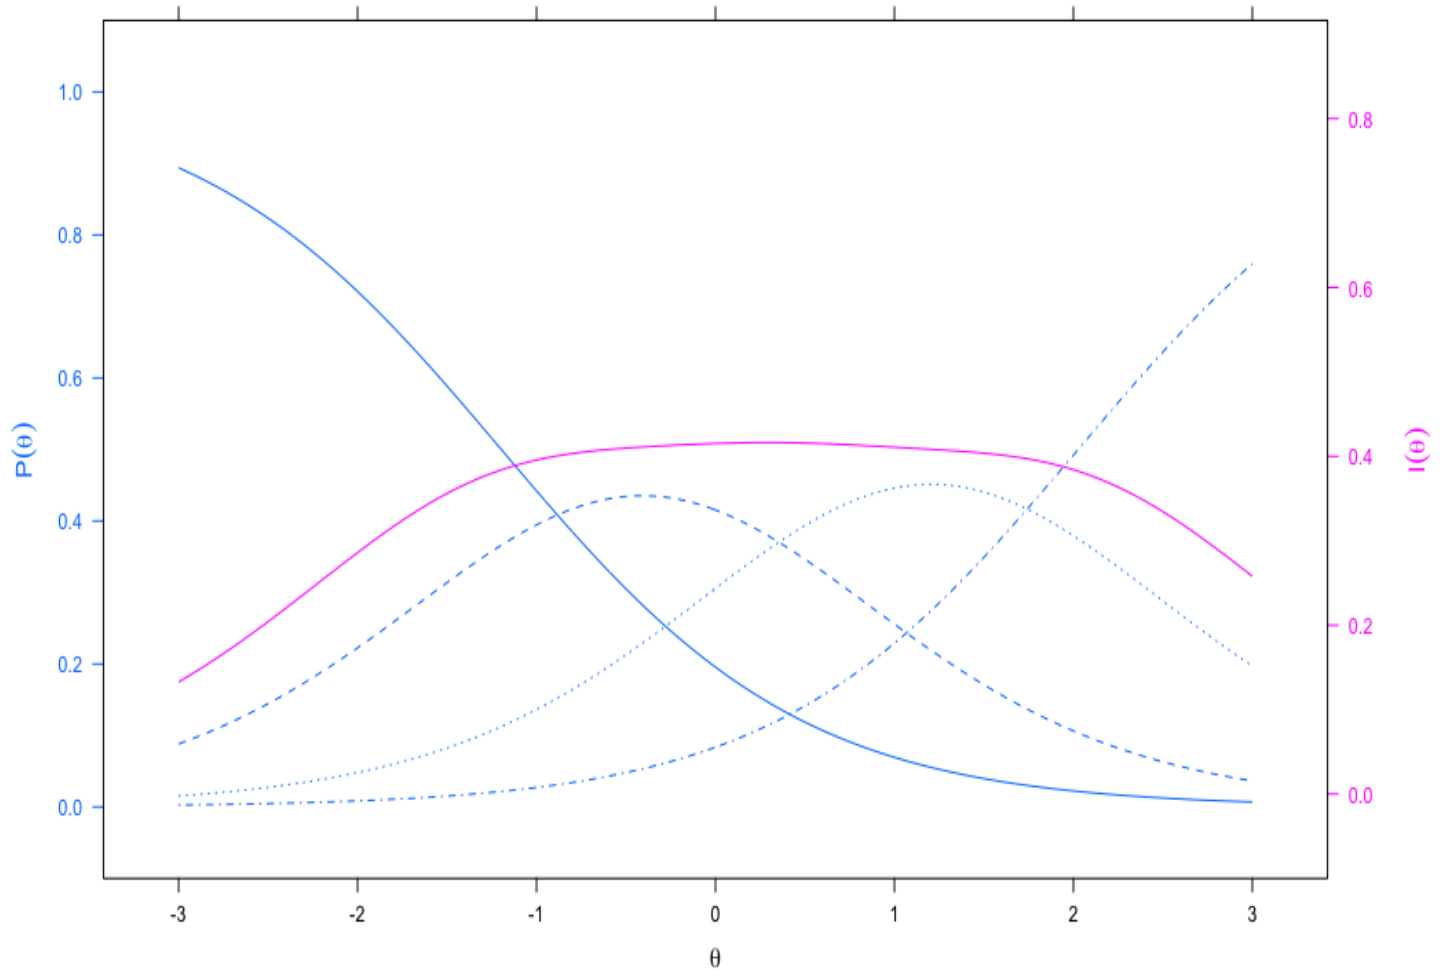

Supplement: Supplementary file 3 [file 17890163]
