# Supplementary material
Source: publisher figshare collection journal article supplement (https://sage.figshare.com/ndownloader/files/17890163)

## Cheerfulness

Factor correlations:

```
F1
F1 1
> coef(polymodel, IRTpars = T)
$T60_2
  a  b1  b2  b3
par 1.227 -1.931 -0.269 1.939

$T60_4sf
  a  b1  b2  b3
par 2.692 -2.431 -0.88 0.609

$T60_9
  a  b1  b2  b3
par 2.03 -2.171 -0.97 0.433

$T60_14sf
  a  b1  b2  b3
par 1.134 -2.197 -0.033 1.945

$T60_16sf
  a  b1  b2  b3
par 1.587 -2.533 -0.887 0.886

$T60_19
  a  b1  b2  b3
par 2.555 -1.756 -0.658 0.615

$T60_22sf
  a  b1  b2  b3
par 2.782 -2.317 -0.876 0.446

$T60_25sf
  a  b1  b2  b3
par 1.913 -2.43 -1.047 0.614

$T60_26
  a  b1  b2  b3
par 1.539 -2.585 -0.728 1.063

$T60_30sf
  a  b1  b2  b3
par 2.826 -2.243 -0.973 0.416

$T60_32
  a  b1  b2  b3
```

par 2.975 -1.907 -0.51 0.949

\$T60\_35sf

a b1 b2 b3

par 0.756 -3.629 -0.853 2.342

\$T60\_38sf

a b1 b2 b3

par 1.656 -3.205 -1.638 0.179

\$T60\_41

a b1 b2 b3

par 1.361 -2.698 -1.06 0.955

\$T60\_44

a b1 b2 b3

par 0.765 -2.49 -0.201 2.624

\$T60\_46

a b1 b2 b3

par 1.968 -1.725 -0.17 1.634

\$T60\_50sf

a b1 b2 b3

par 3.099 -1.843 -0.524 1.045

\$T60\_53

a b1 b2 b3

par 1.485 -2.32 -0.903 0.606

\$T60\_57

a b1 b2 b3

par 1.63 -3.398 -1.904 -0.026

\$T60\_59sf

a b1 b2 b3

par 1.957 -2.287 -0.646 0.953

\$GroupPars

MEAN\_1 COV\_11

par 0 1

|   | item     | S_X2   | df.S_X2 | p.S_X2 |
|---|----------|--------|---------|--------|
| 1 | T60_2    | 94.967 | 79      | 0.106  |
| 2 | T60_4sf  | 39.279 | 44      | 0.674  |
| 3 | T60_9    | 65.235 | 54      | 0.141  |
| 4 | T60_14sf | 88.922 | 81      | 0.256  |
| 5 | T60_16sf | 59.292 | 59      | 0.465  |

|    |          |         |    |       |
|----|----------|---------|----|-------|
| 6  | T60_19   | 65.749  | 57 | 0.200 |
| 7  | T60_22sf | 55.358  | 46 | 0.162 |
| 8  | T60_25sf | 60.998  | 53 | 0.210 |
| 9  | T60_26   | 62.200  | 62 | 0.469 |
| 10 | T60_30sf | 65.122  | 44 | 0.021 |
| 11 | T60_32   | 45.824  | 45 | 0.438 |
| 12 | T60_35sf | 72.634  | 87 | 0.865 |
| 13 | T60_38sf | 82.358  | 54 | 0.008 |
| 14 | T60_41   | 76.374  | 64 | 0.138 |
| 15 | T60_44   | 117.990 | 90 | 0.026 |
| 16 | T60_46   | 59.016  | 63 | 0.619 |
| 17 | T60_50sf | 40.524  | 44 | 0.621 |
| 18 | T60_53   | 75.893  | 68 | 0.239 |
| 19 | T60_57   | 63.597  | 54 | 0.174 |
| 20 | T60_59sf | 48.051  | 56 | 0.766 |

Item trace lines

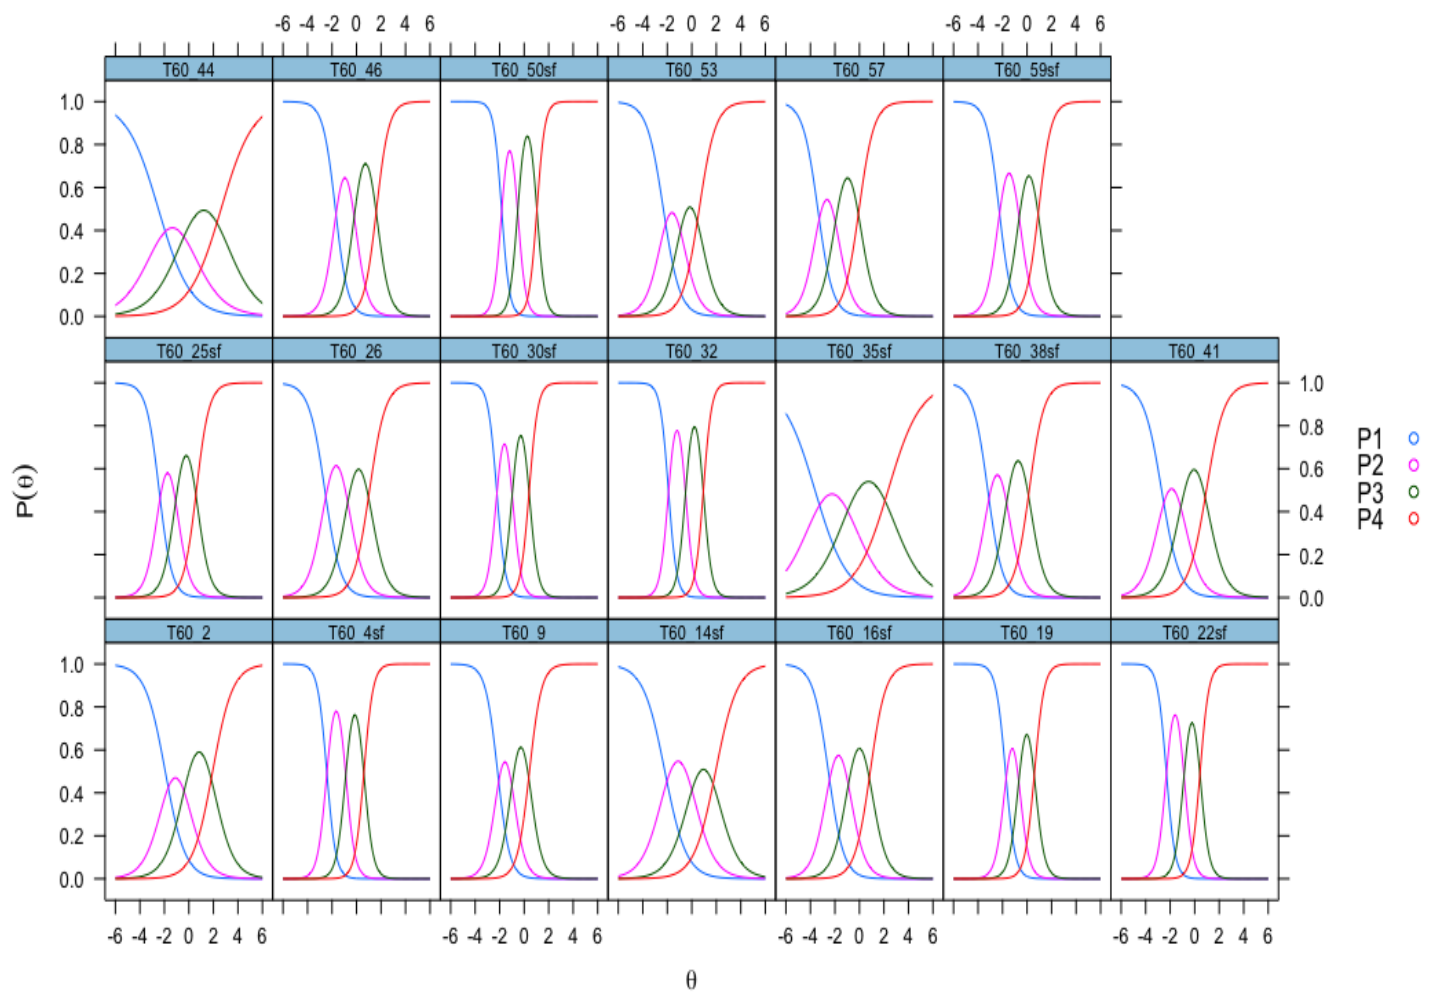

Trace lines and information for item 1

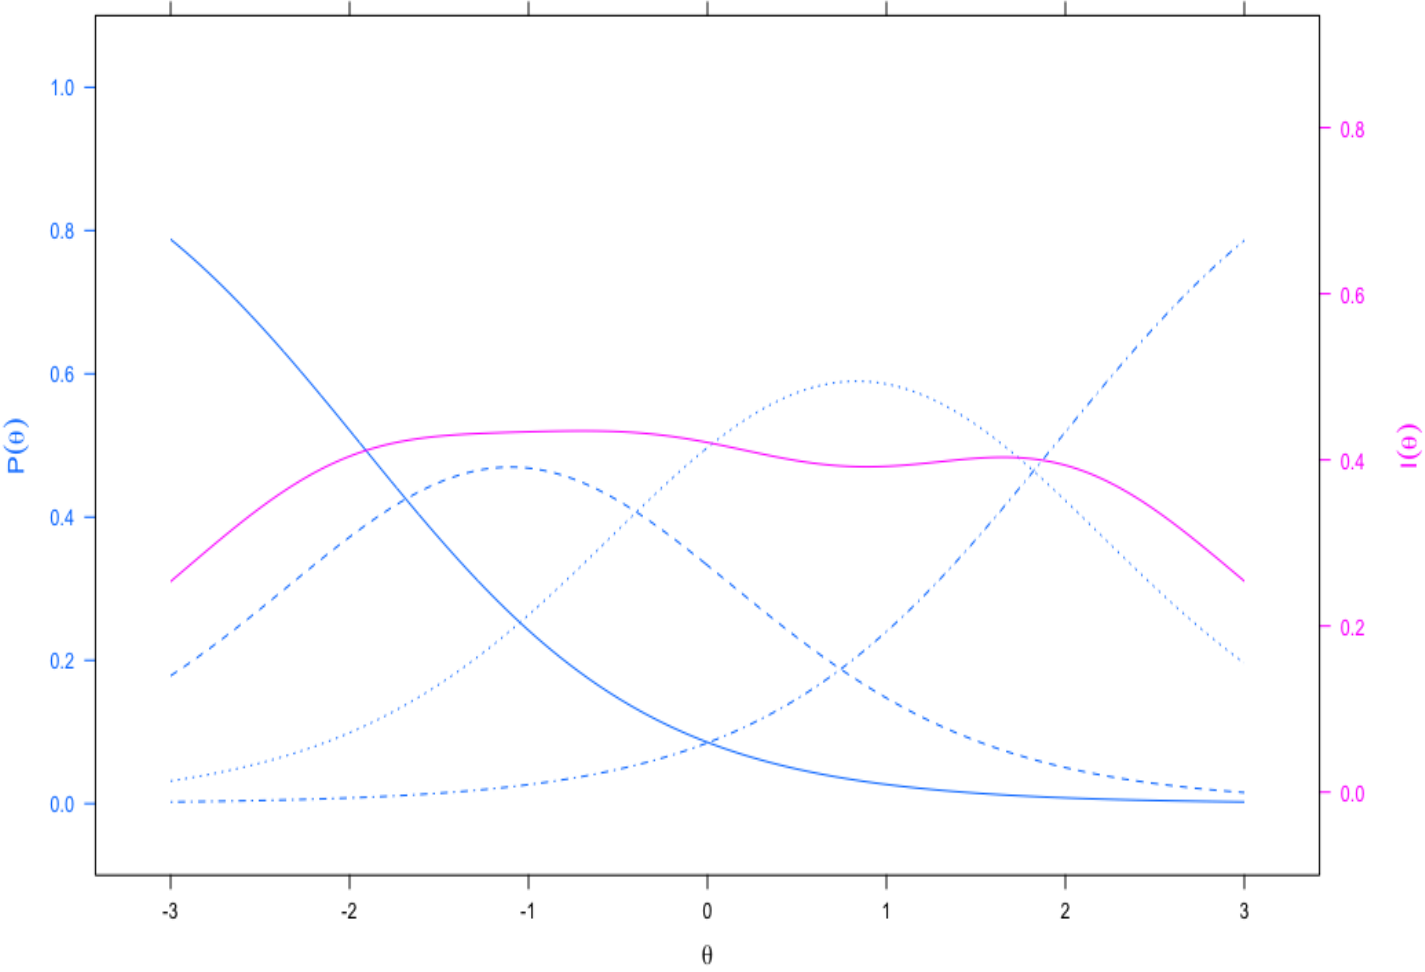

Trace lines and information for item 2

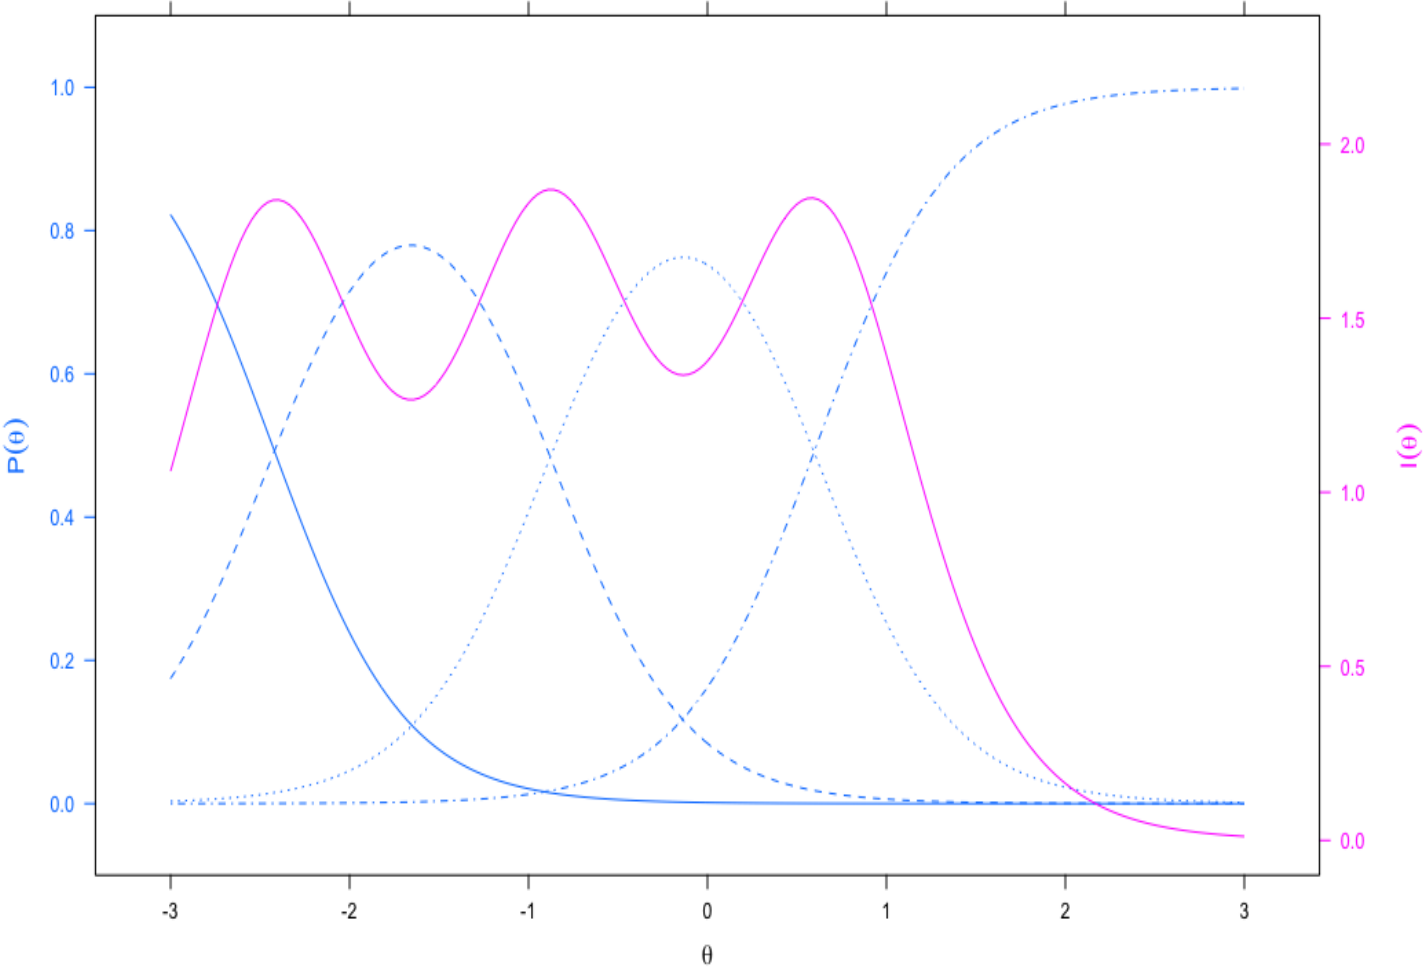

Trace lines and information for item 3

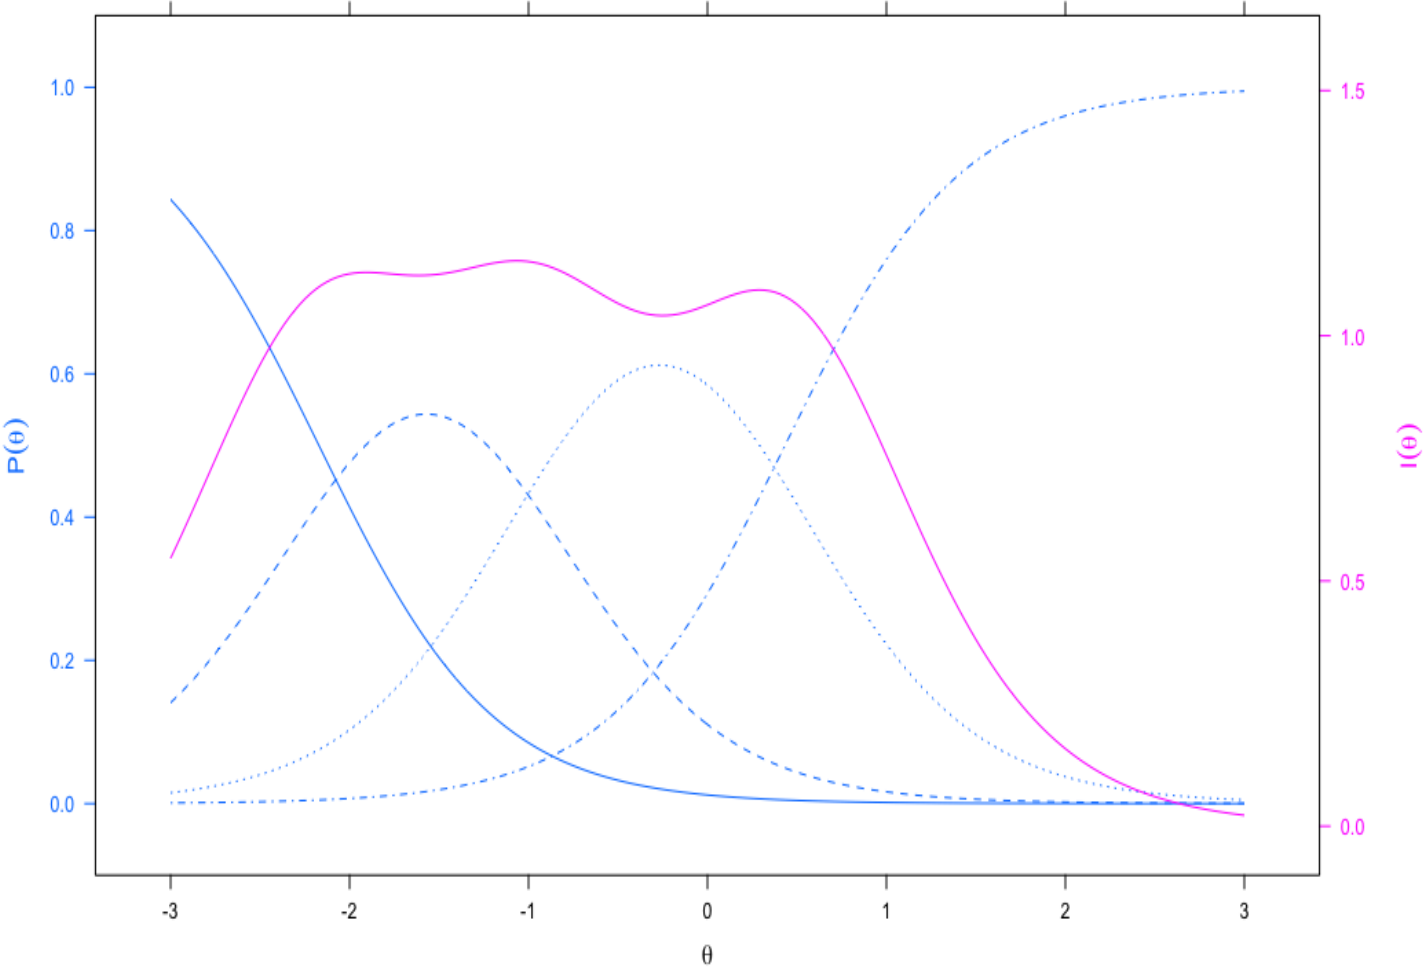

Trace lines and information for item 4

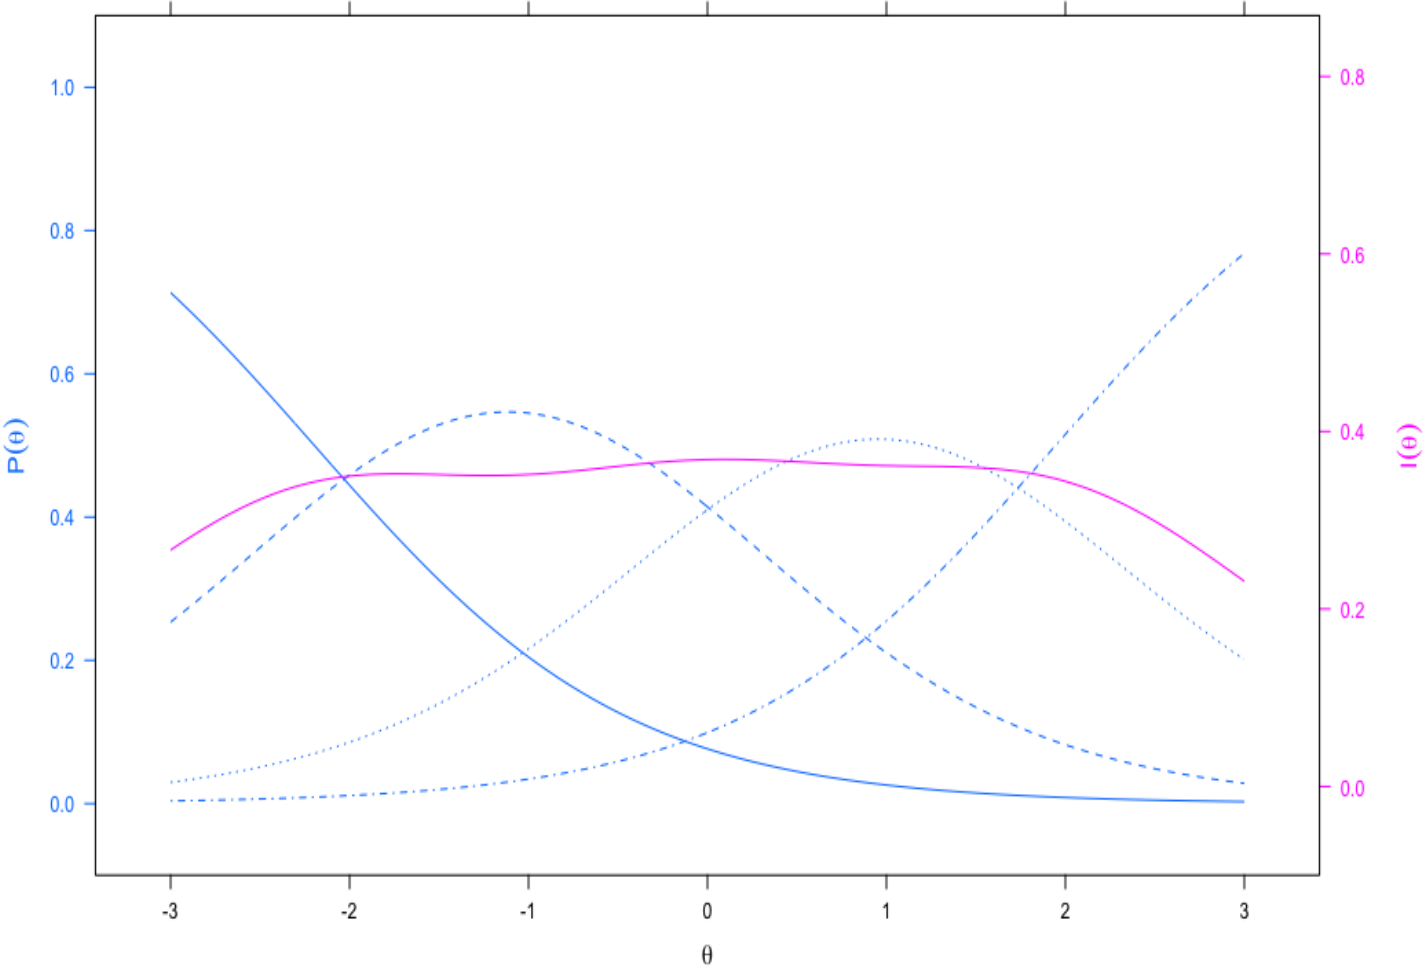

Trace lines and information for item 5

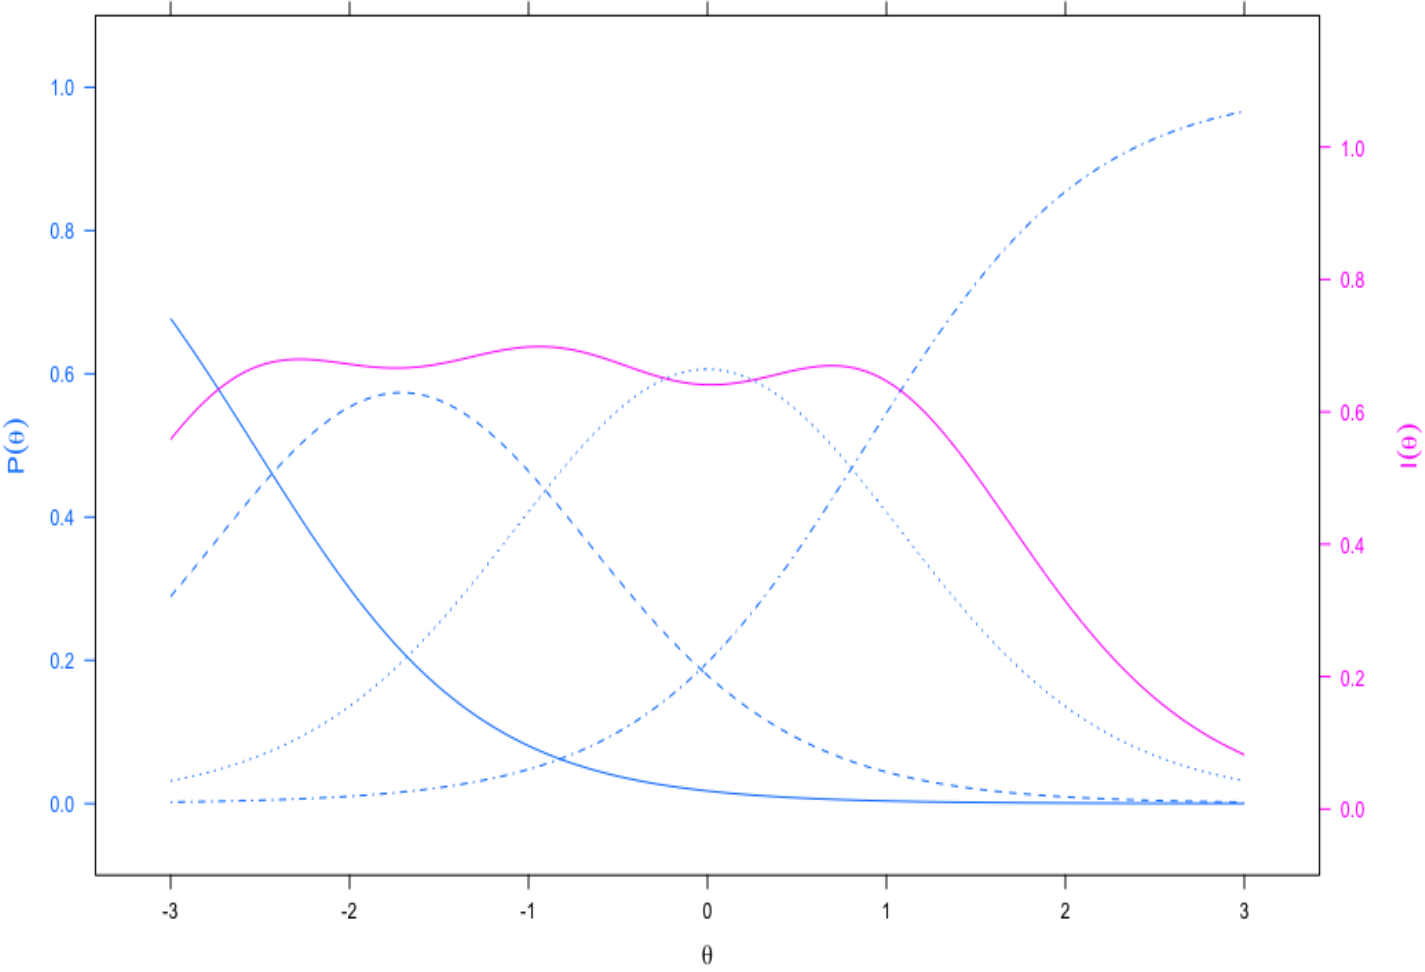



Trace lines and information for item 6

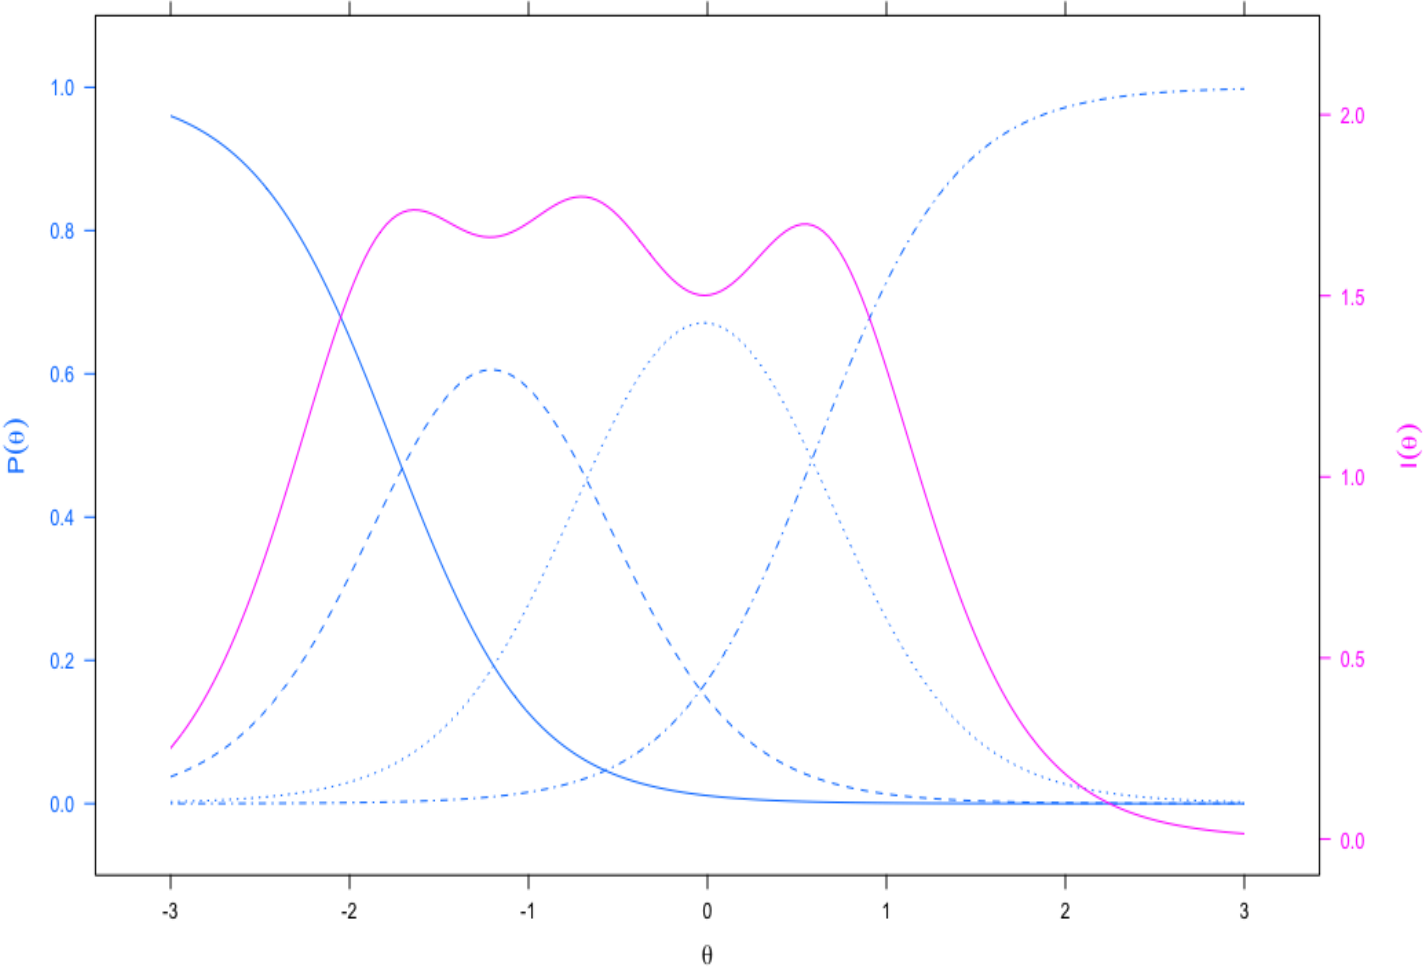

Trace lines and information for item 7

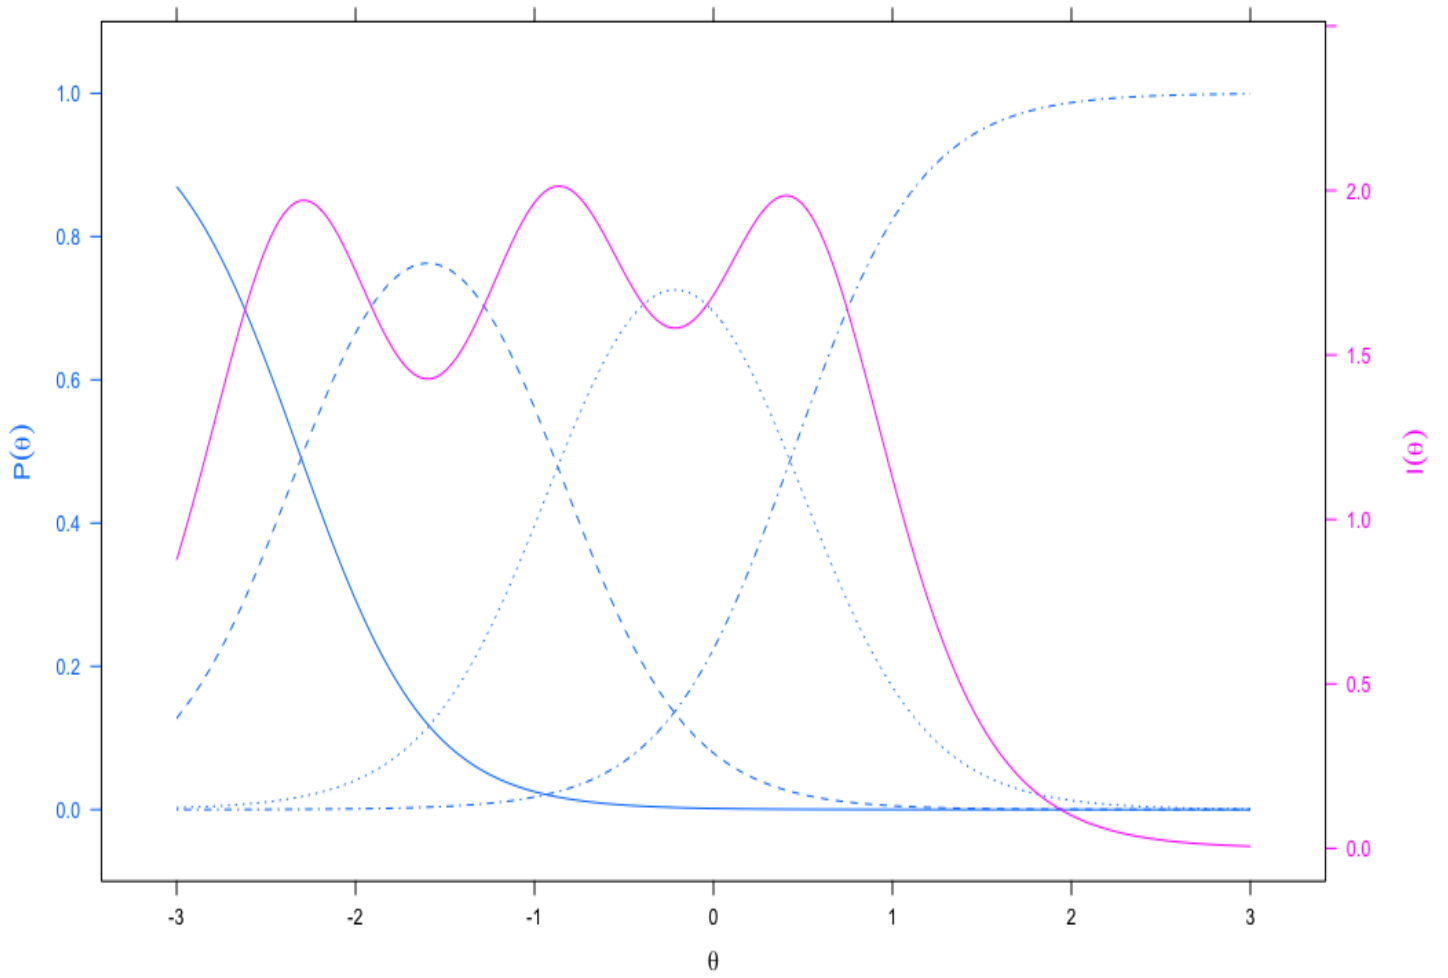

Trace lines and information for item 7



Trace lines and information for item 9

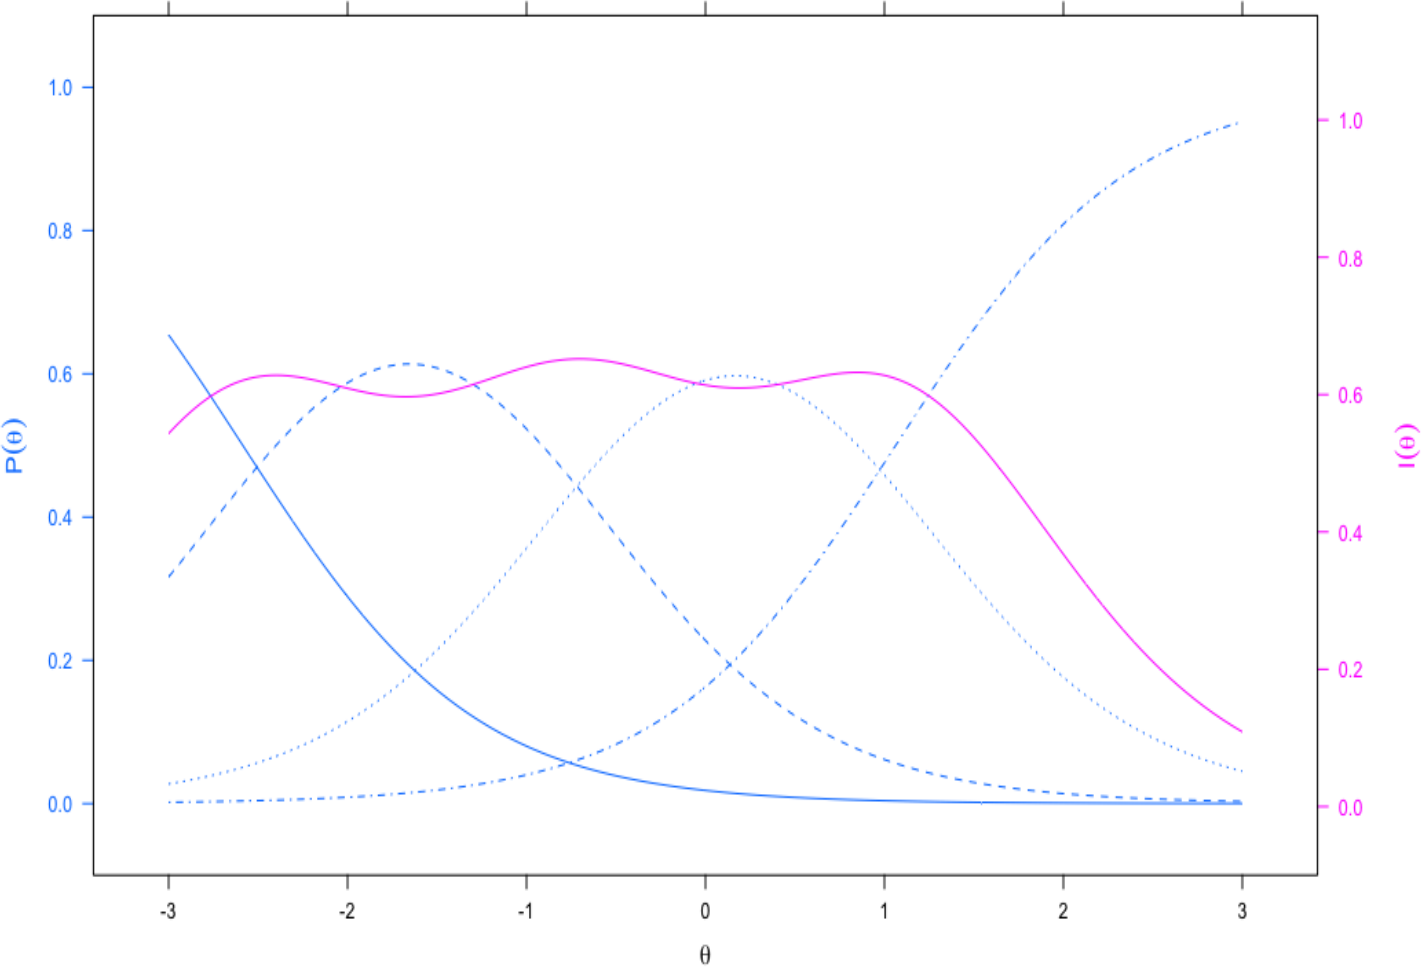

Trace lines and information for item 10

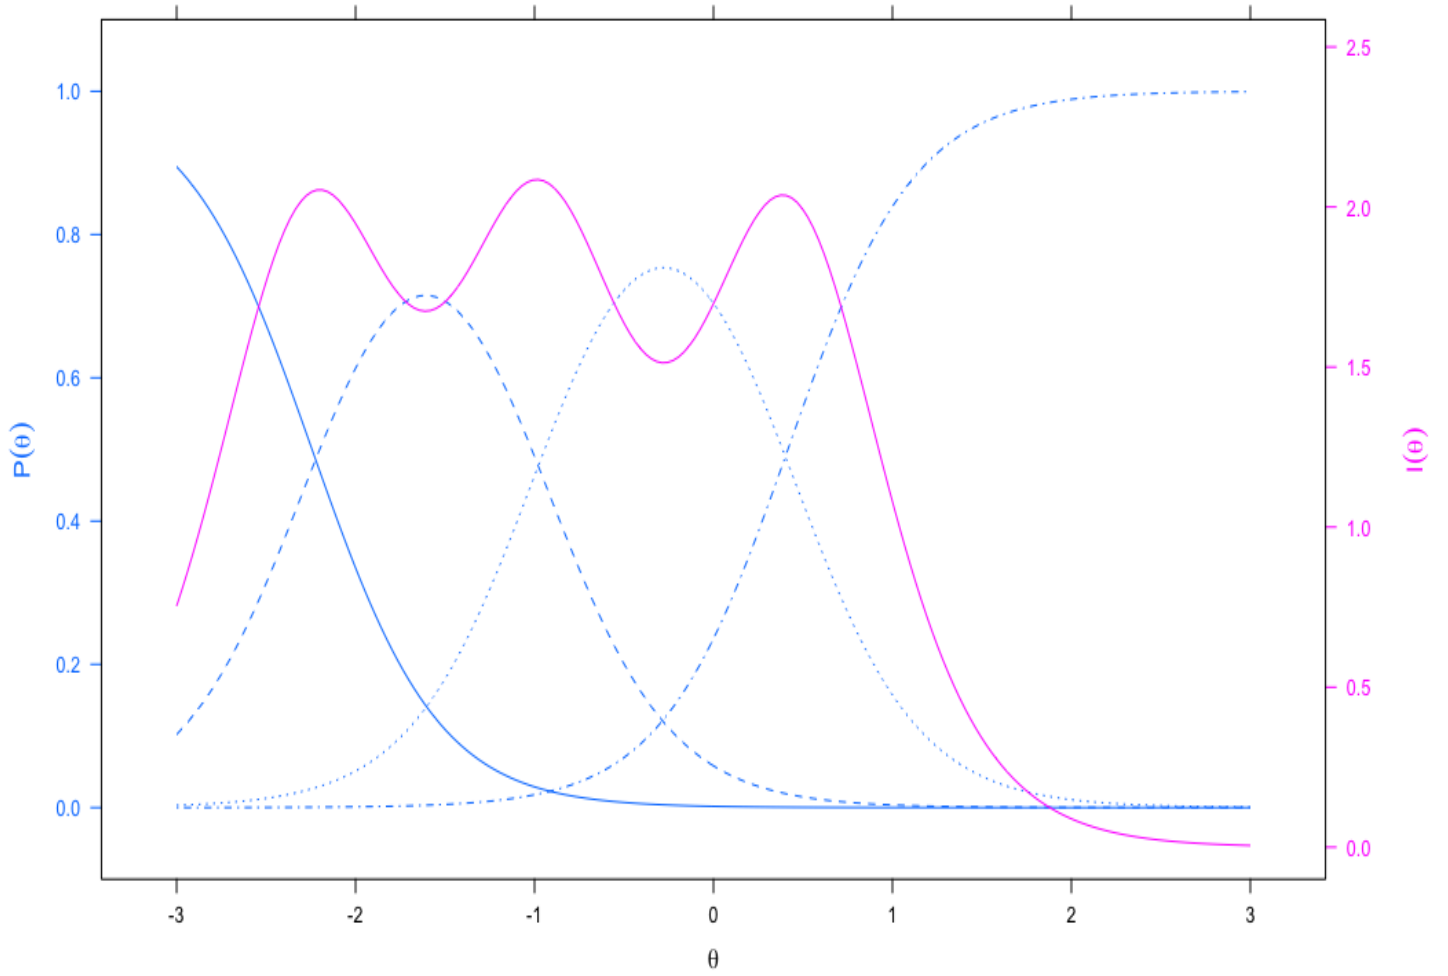

Trace lines and information for item 11

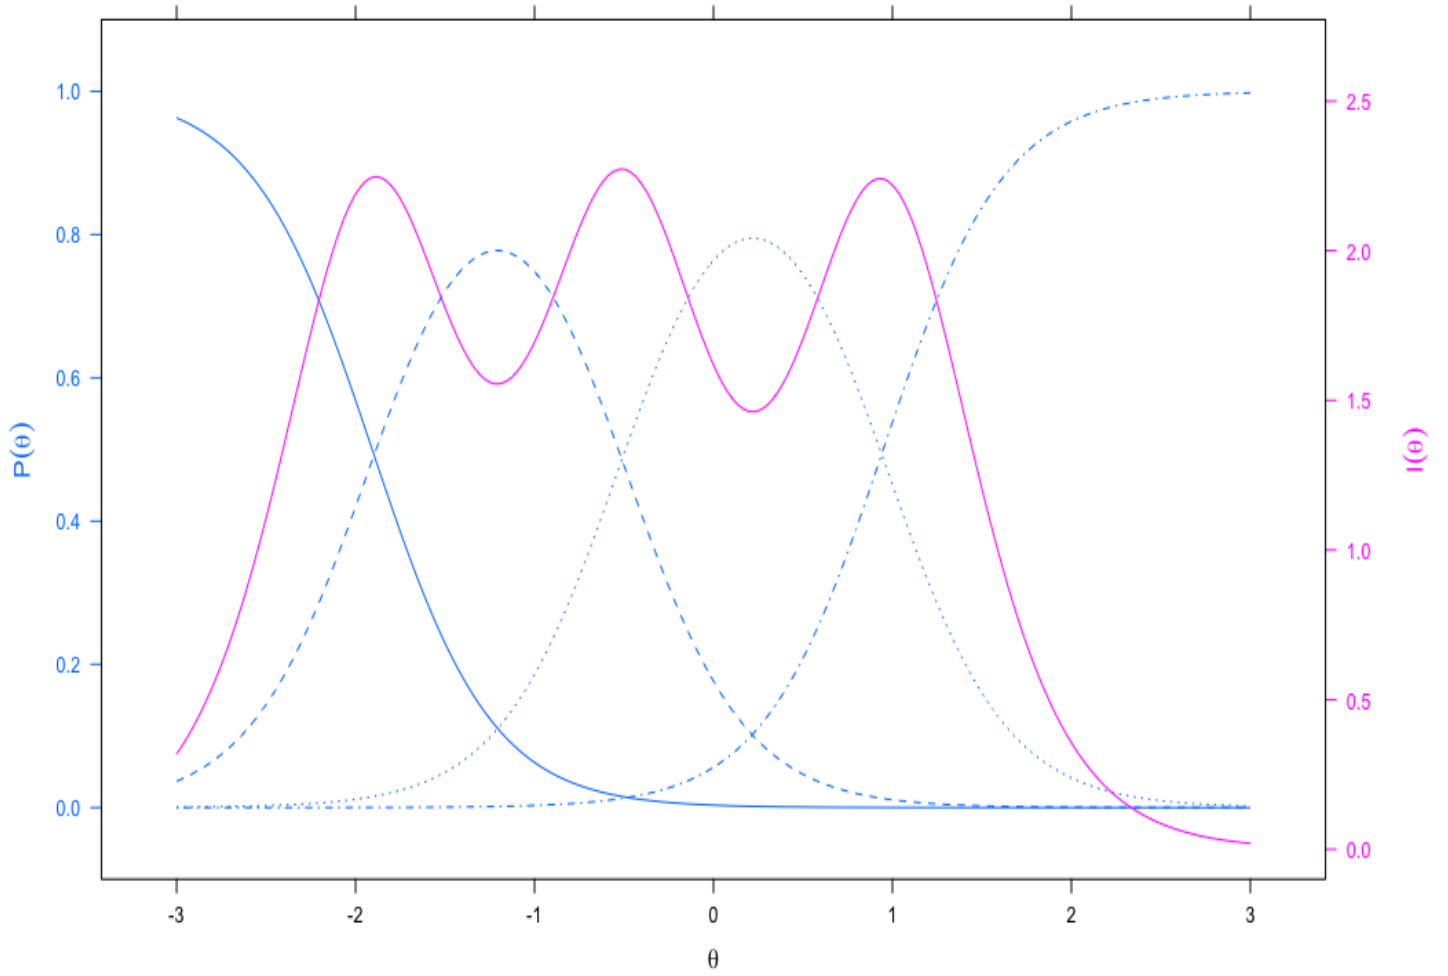

Trace lines and information for item 12

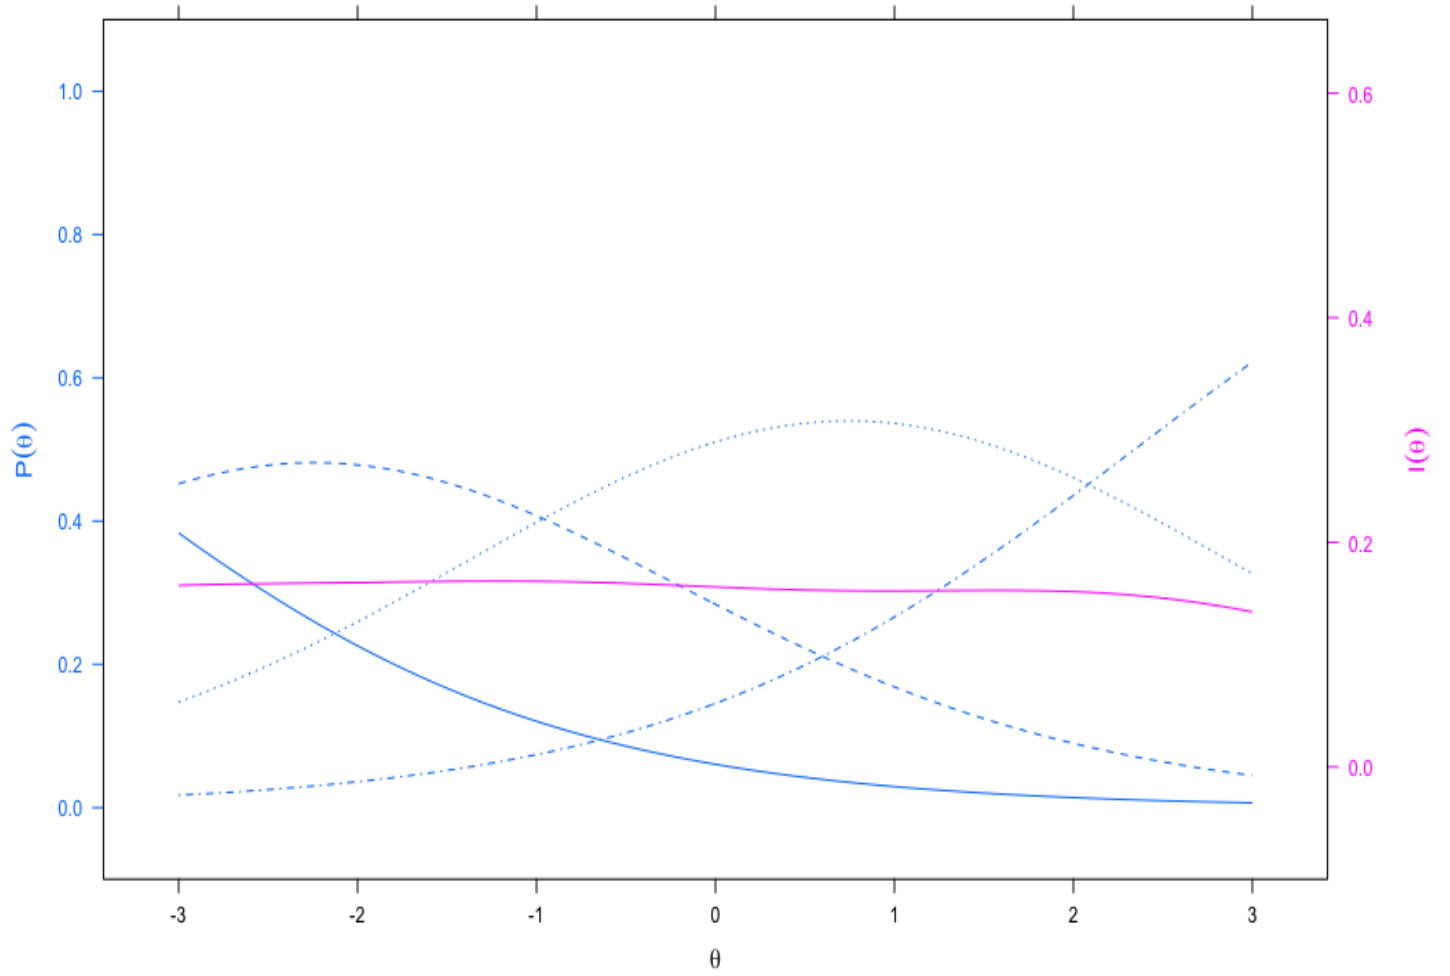

Trace lines and information for item 13

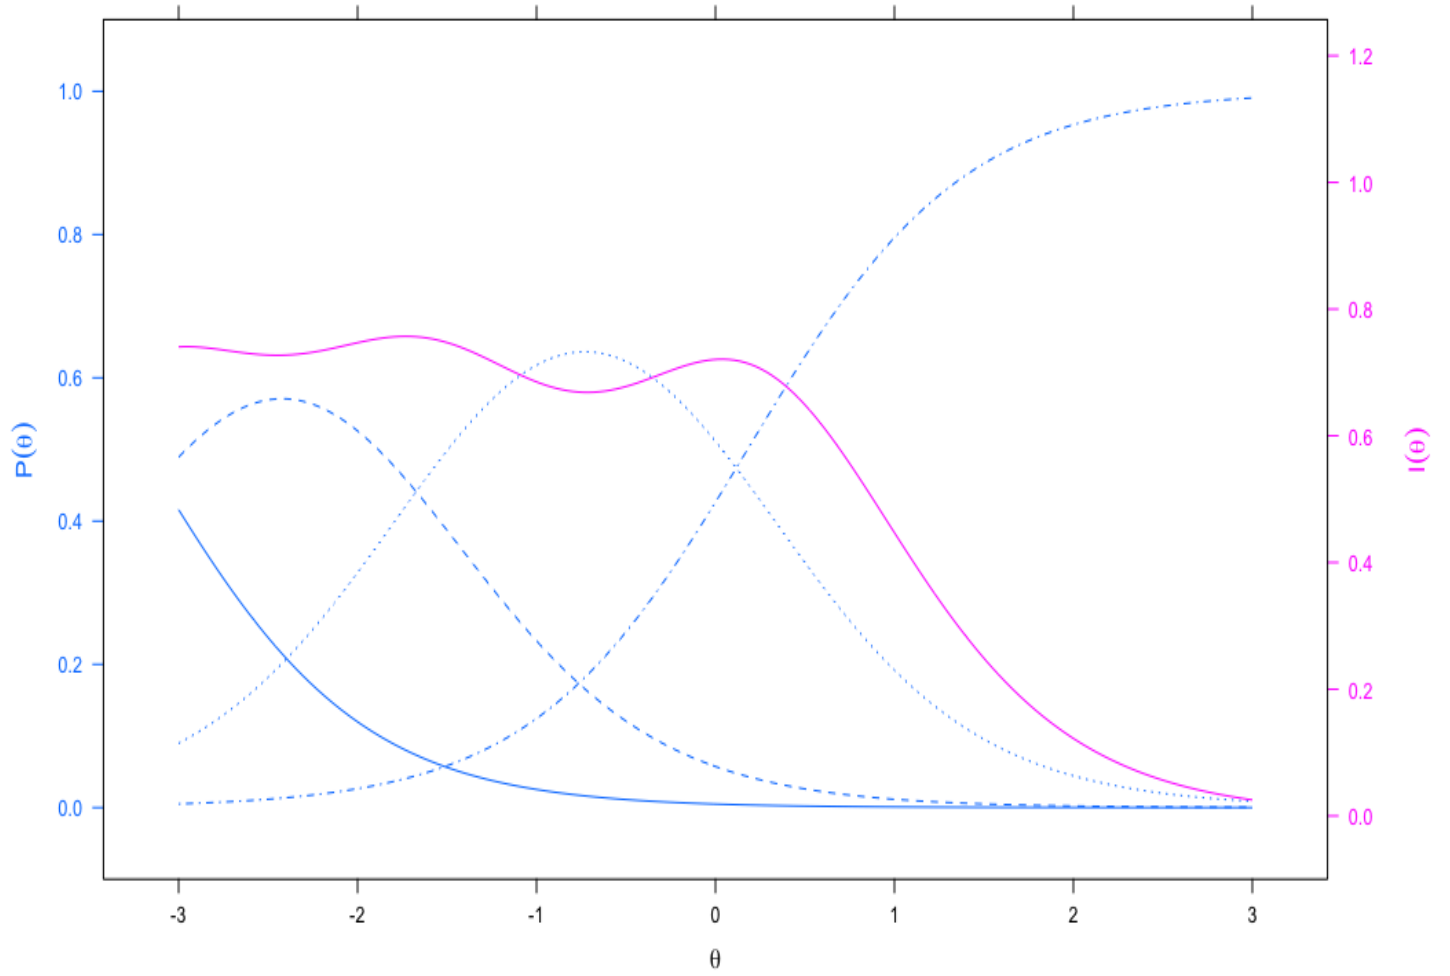



Trace lines and information for item 14

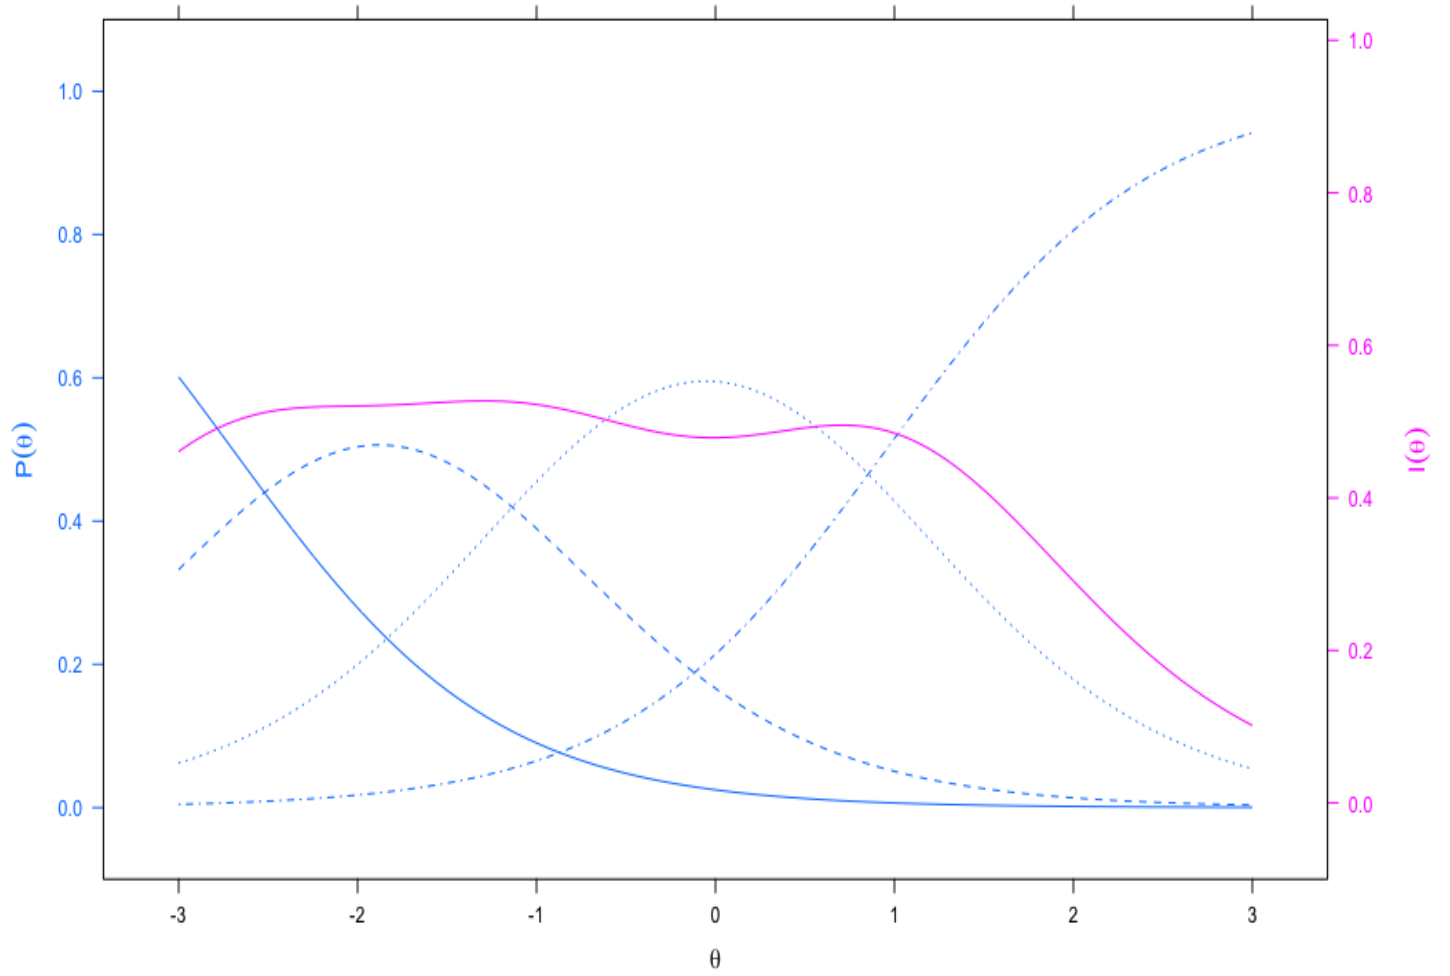

Trace lines and information for item 15

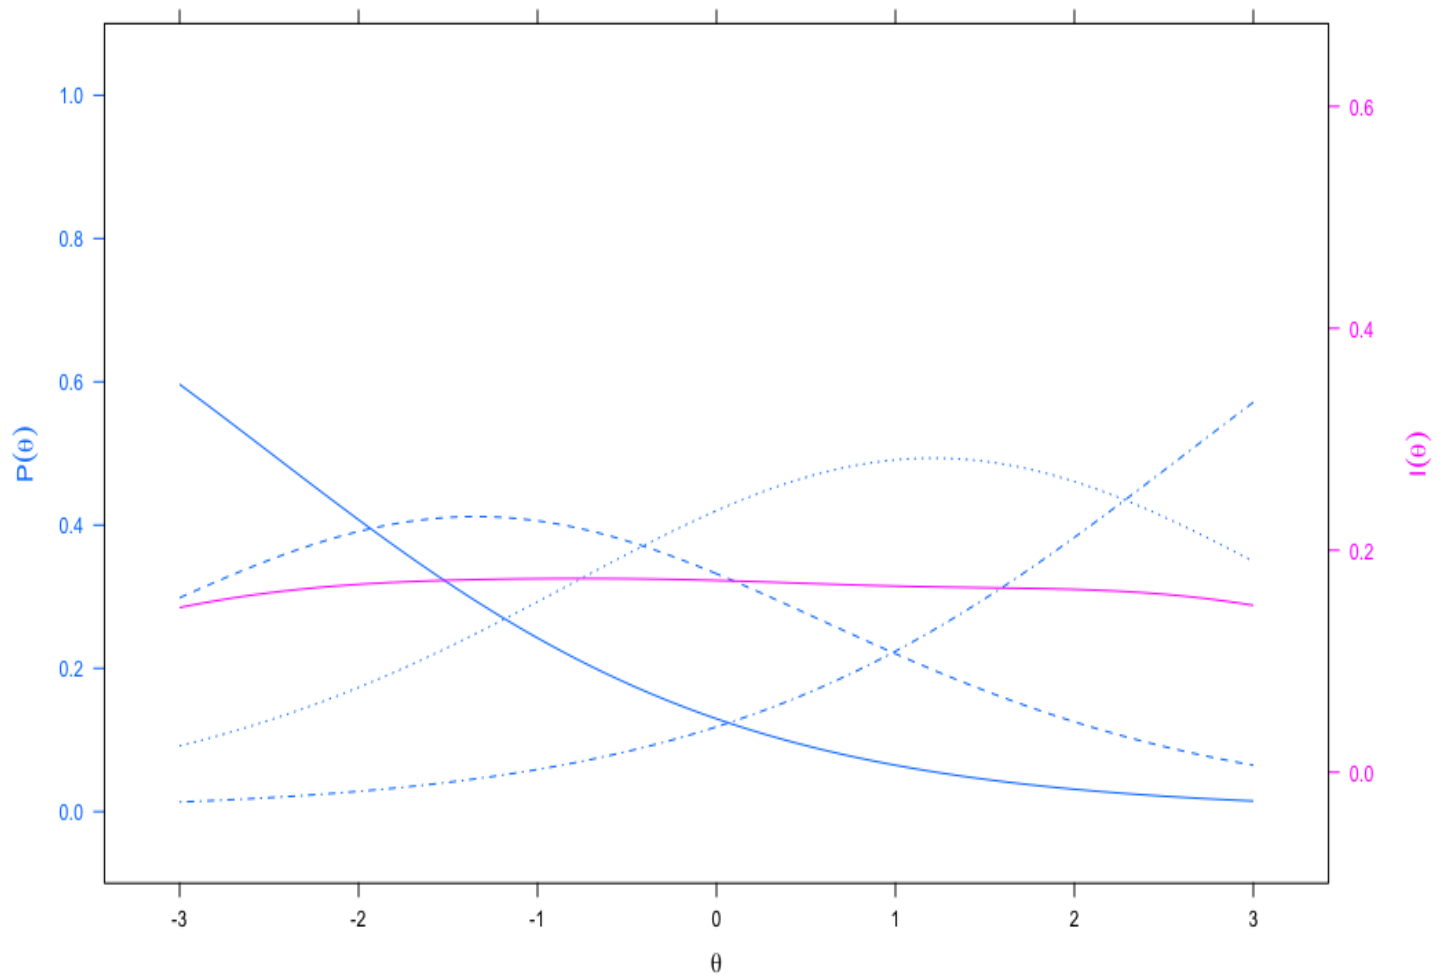

Trace lines and information for item 16

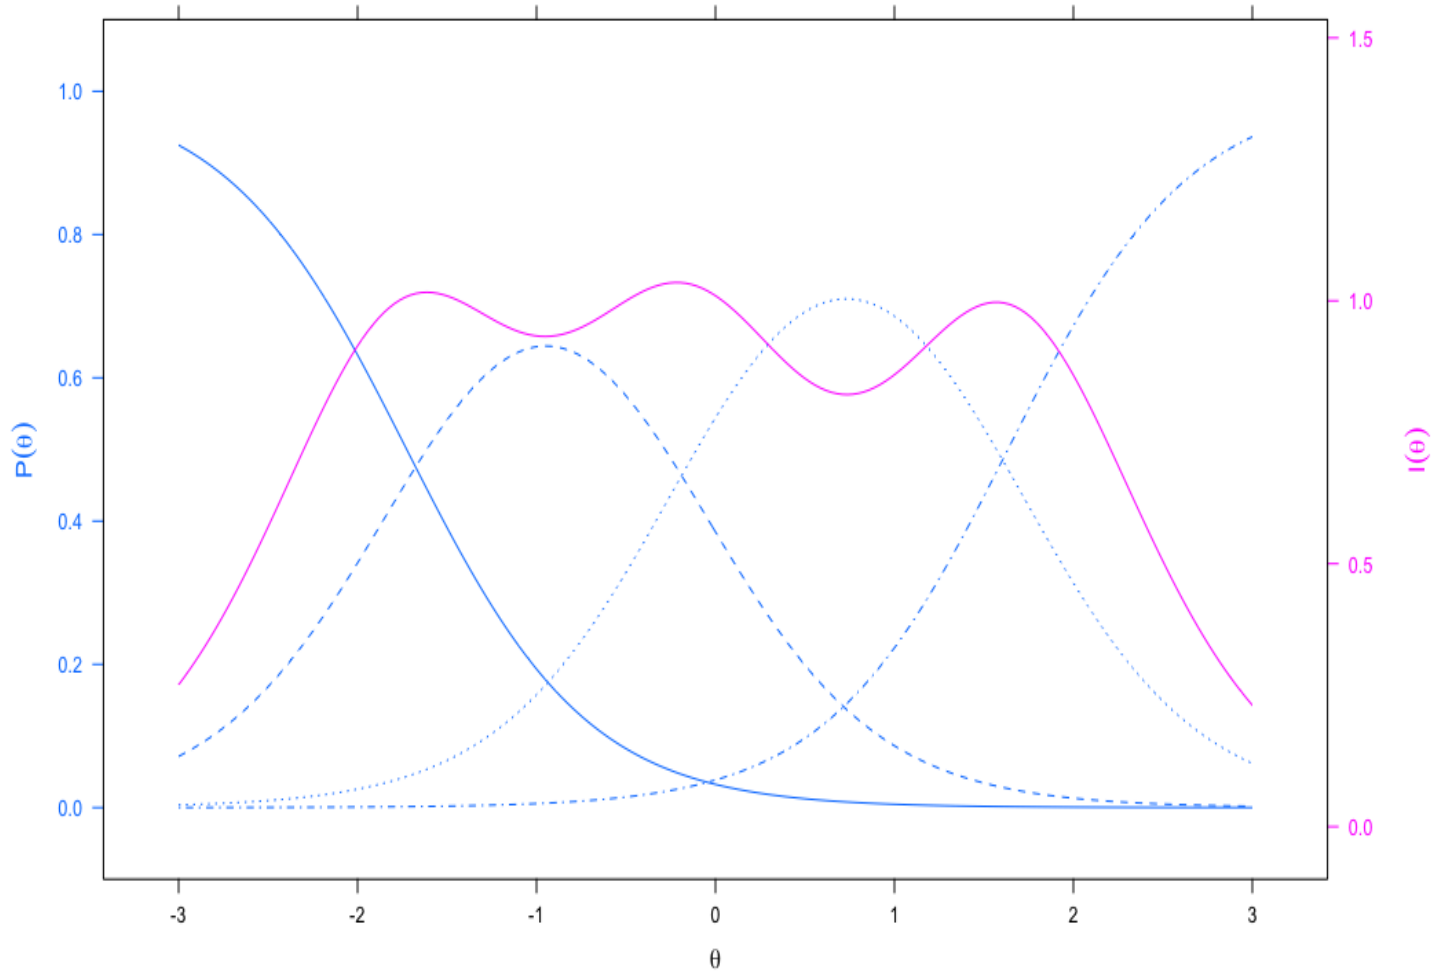

Trace lines and information for item 17

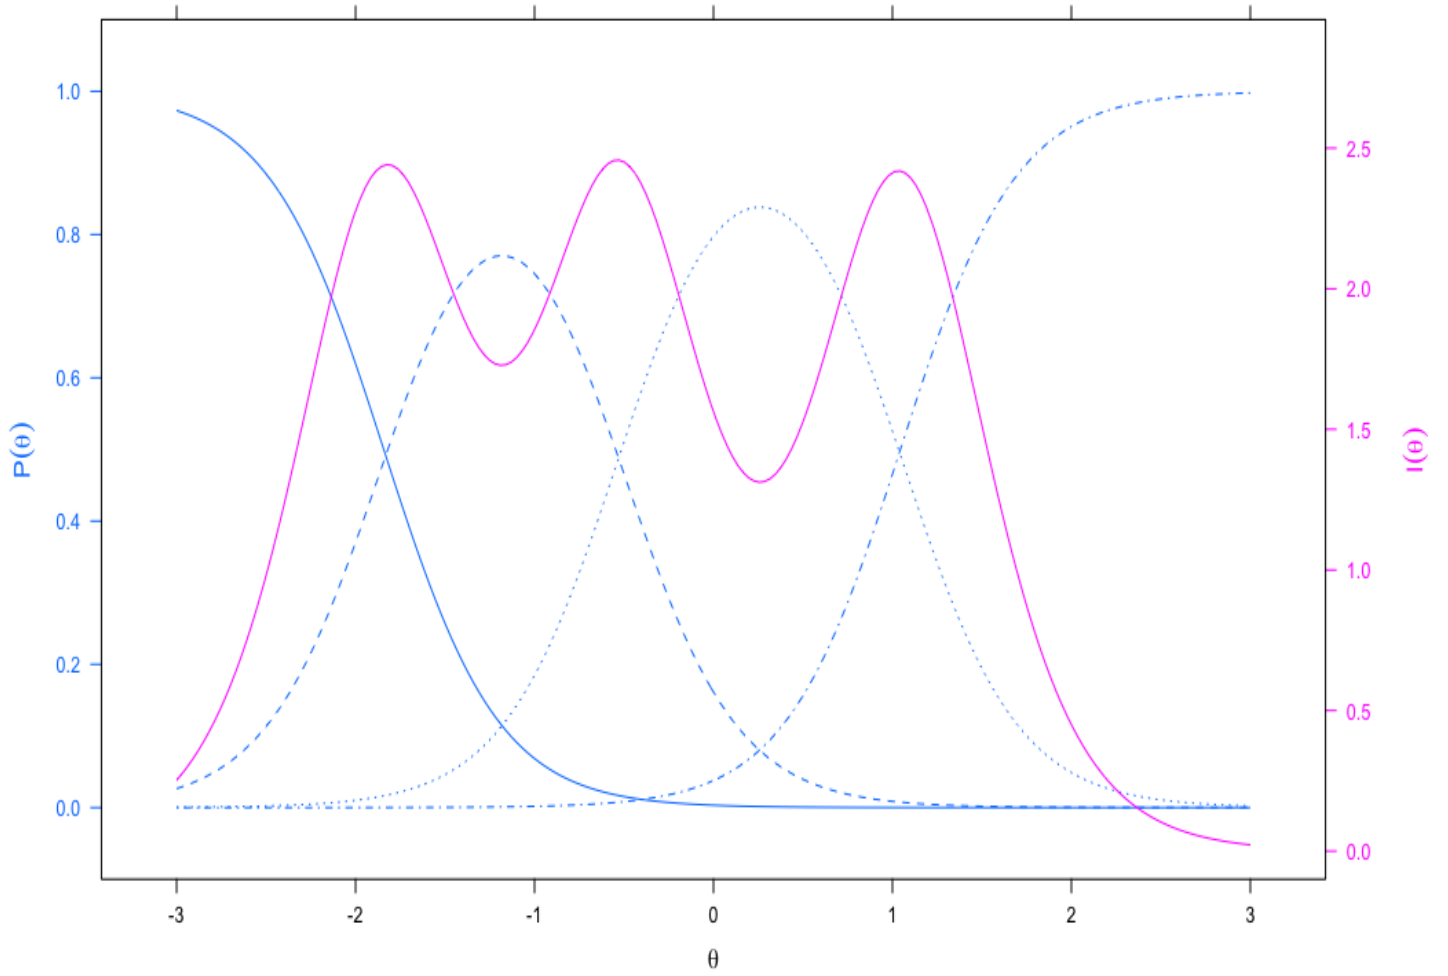

Trace lines and information for item 18

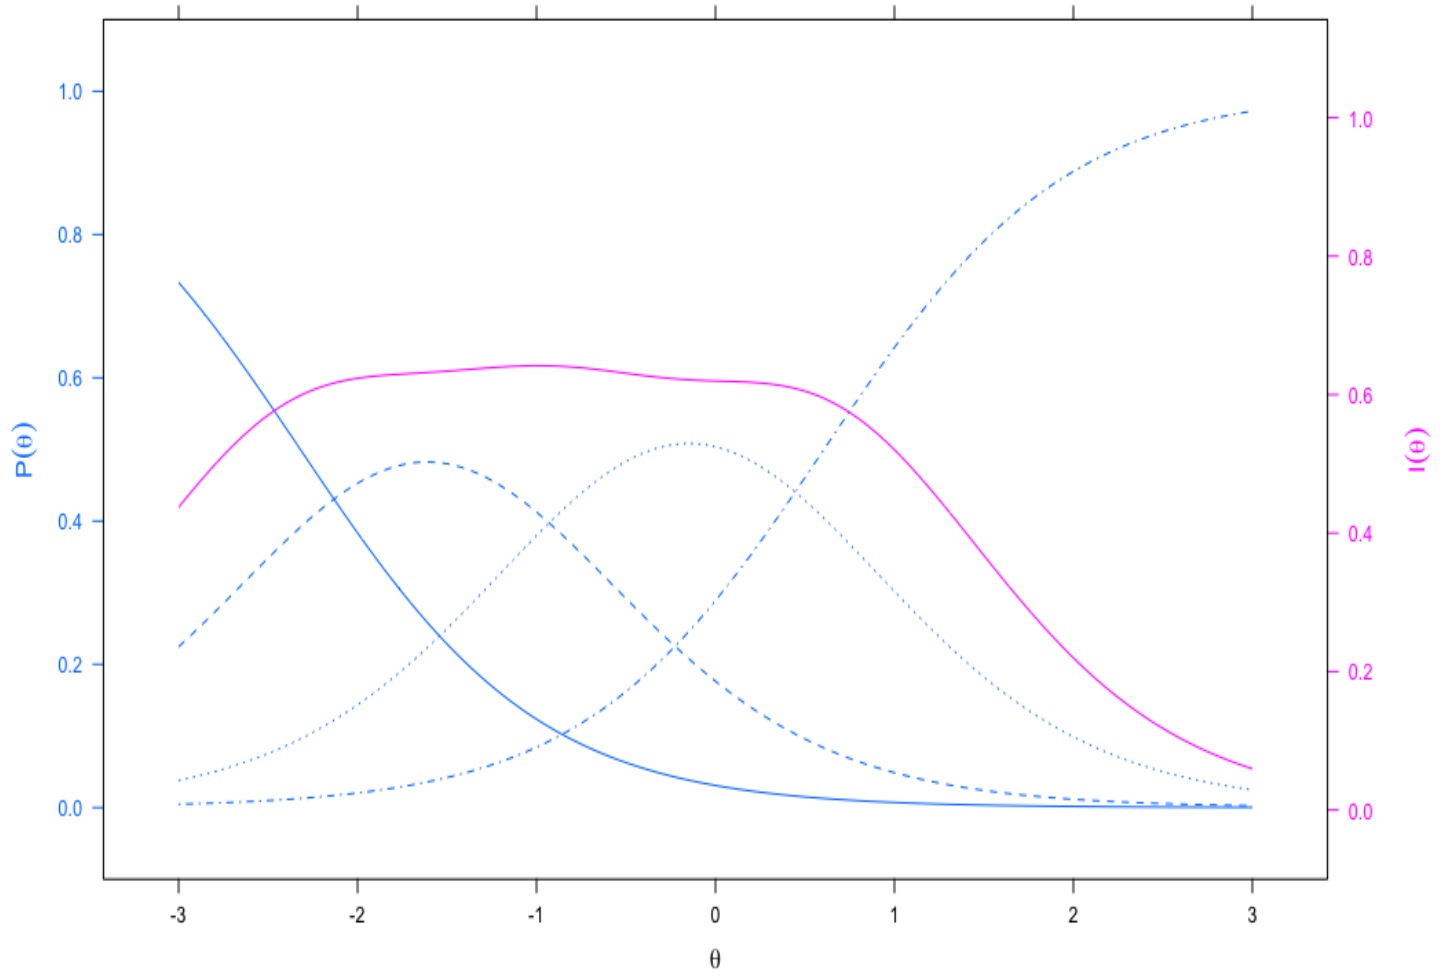

Trace lines and information for item 19

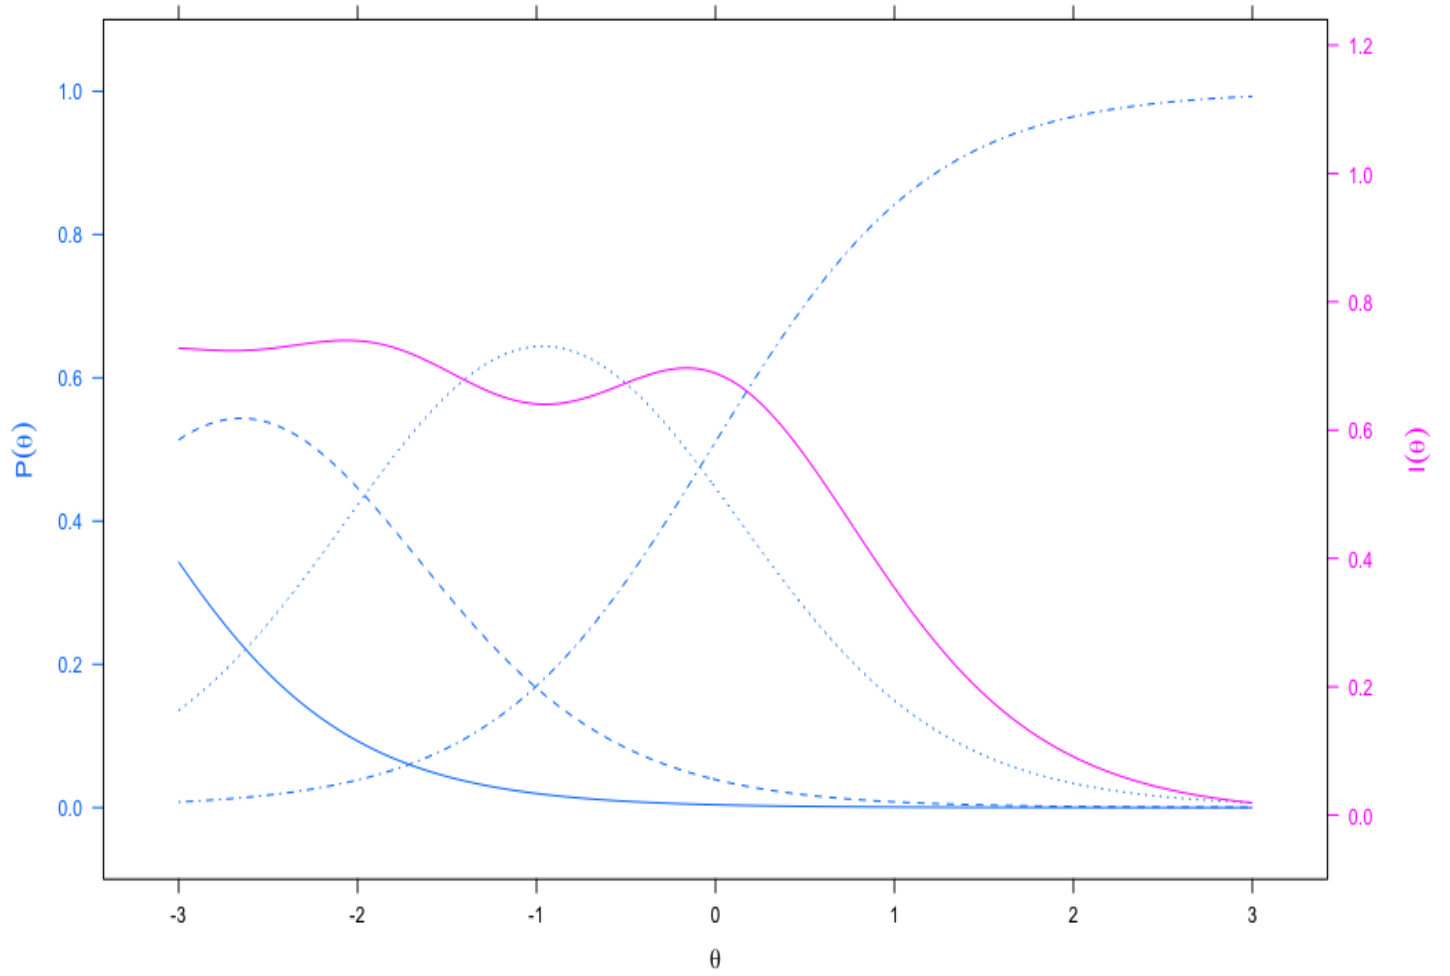

Trace lines and information for item 20

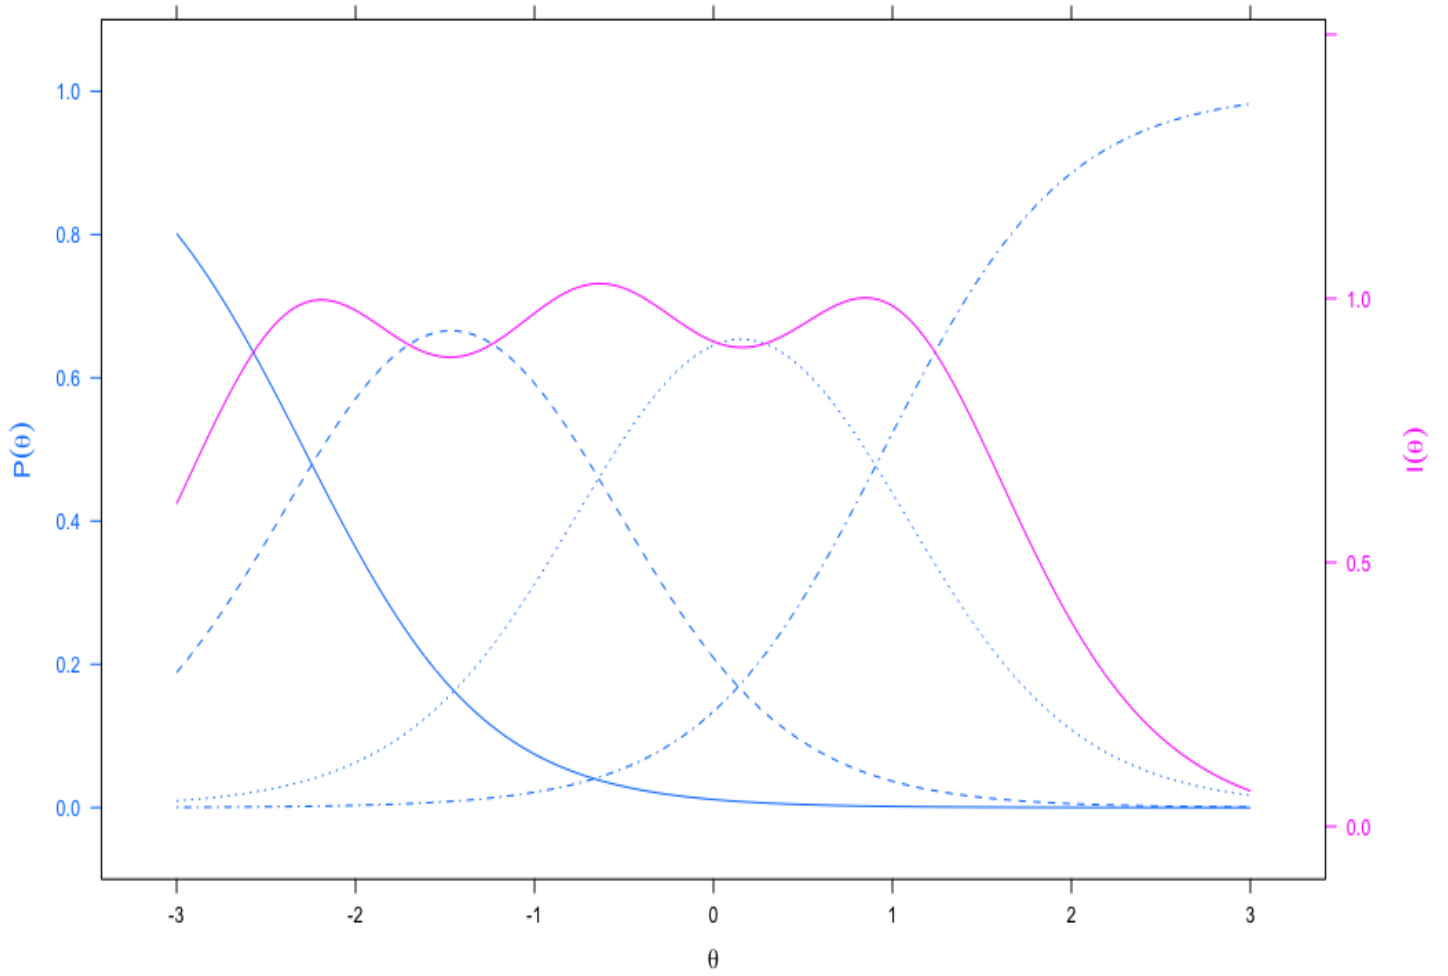

Supplement: Supplementary file 6 [file 17890163]
