# Supplementary material
Source: publisher figshare collection journal article supplement (https://sage.figshare.com/ndownloader/files/17890163)
Supplement: Supplementary file 1 [file 17890163]

### **Supplementary Materials B**

|                |    | <b>Factor<br/>Loadings<br/>English<br/>Version</b> | <b>Factor<br/>Loadings<br/>Italian<br/>Version</b> |
|----------------|----|----------------------------------------------------|----------------------------------------------------|
| <b>T60_BM1</b> | BM | ,882                                               | ,922                                               |
| <b>T60_BM2</b> | BM | ,805                                               | ,842                                               |
| <b>T60_BM3</b> | BM | ,688                                               | ,692                                               |
| <b>T60_BM4</b> | BM | ,814                                               | ,789                                               |
| <b>T60_CH1</b> | CH | ,900                                               | ,915                                               |
| <b>T60_CH2</b> | CH | ,742                                               | ,840                                               |
| <b>T60_CH3</b> | CH | ,761                                               | ,719                                               |
| <b>T60_CH4</b> | CH | ,699                                               | ,720                                               |
| <b>T60_CH5</b> | CH | ,765                                               | ,804                                               |
| <b>T60_SE5</b> | SE | ,609                                               | ,670                                               |
| <b>T60_SE4</b> | SE | ,623                                               | ,550                                               |
| <b>T60_SE3</b> | SE | ,743                                               | ,683                                               |
| <b>T60_SE2</b> | SE | ,677                                               | ,668                                               |
| <b>T60_SE1</b> | SE | ,592                                               | ,687                                               |
