# Supplementary material
Source: publisher figshare collection journal article supplement (https://sage.figshare.com/ndownloader/files/17890163)
Supplement: Supplementary file 2 [file 17890163]

**Supplementary Material.** The original 60-item set with theoretical origins from Ruch et al. (1996).

| Facet | N <sub>i</sub> | Description                                                                                                                                                                          | Example Item                                                                           |
|-------|----------------|--------------------------------------------------------------------------------------------------------------------------------------------------------------------------------------|----------------------------------------------------------------------------------------|
| CH1   | 5              | Prevalence of cheerful mood                                                                                                                                                          | I am a merry person.                                                                   |
| CH2   | 3              | Low threshold for smiling and laughter                                                                                                                                               | I often smile.                                                                         |
| CH3   | 4              | Composed view of adverse life circumstances                                                                                                                                          | Many adversities of everyday life actually do have a positive side.                    |
| CH4   | 4              | Broad range of active elicitors of cheerfulness and smiling/laughter                                                                                                                 | I often find that the small things in everyday life are really funny and amusing.      |
| CH5   | 4              | Generally cheerful interaction style                                                                                                                                                 | I like to kid around with others.                                                      |
| SE1   | 5              | Prevalence of serious states                                                                                                                                                         | I am a serious person.                                                                 |
| SE2   | 3              | Perception of even everyday happenings as important and taking it into consideration thoroughly and intensively (rather than treating them superficial)                              | Even seemingly trivial things have to be treated seriously and responsibly.            |
| SE3   | 4              | Tendency to plan ahead and set long-range goals (and attaining the closest possible harmony with these goals in every action and decision)                                           | I plan my actions and make my decisions so that they are useful to me in the long run. |
| SE4   | 4              | Tendency to prefer activities for which concrete, rational reasons can be produced (thereby considering activities which don't have a specific goal as a waste of time and nonsense) | I try to spend my free time doing things as useful as possible.                        |
| SE5   | 4              | Preference for a sober, object-oriented communication style                                                                                                                          | I prefer people who communicate with deliberation and objectivity.                     |
| BM1   | 5              | Prevalence of bad mood                                                                                                                                                               | I am often in a bad mood.                                                              |
| BM2   | 6              | Prevalence of sadness                                                                                                                                                                | Sometimes I am distressed for a very long time.                                        |
| BM3   | 3              | Sad and ill-humoured behavior in cheerfulness evoking situations, the attitudes toward such situations and the objects, persons, and roles involved                                  | When I am distressed, even a very funny thing fails to cheer me up.                    |
| BM4   | 6              | Prevalence of ill-humoredness                                                                                                                                                        | I am often sullen.                                                                     |

Note. N<sub>i</sub> = number of items. Compared to the STCI-106, the STCI-60 did not retain any items from Facet 6 of Seriousness. Similar to Chen et al. (2017) BM3 and BM5 have been reduced to 1 single facet in BM3 as few items were retained from the facet and both of these formulations related to non-cheerful behaviours and attitudes.
