# Supplementary material
Source: publisher figshare collection journal article supplement (https://sage.figshare.com/ndownloader/files/17890163)
Supplement: Supplementary file 4 [file 17890163]

Supplementary Materials C.

*Chi square fit statistic, item discrimination (a) and category threshold (b<sub>i</sub>) estimates) for the STCI-T60 Italian trait version.*

| Item                                                                                  | S- $\chi^2$ (df) | <i>a</i> | <i>b</i> <sub>1</sub> | <i>b</i> <sub>2</sub> | <i>b</i> <sub>3</sub> |
|---------------------------------------------------------------------------------------|------------------|----------|-----------------------|-----------------------|-----------------------|
| Cheerfulness                                                                          |                  |          |                       |                       |                       |
| 2. My way of life can be described as positive and carefree.                          | 94.97<br>(79)    | 1.23     | -1.93                 | -0.27                 | 1.94                  |
| 4. I am a cheerful person.                                                            | 39.28<br>(44)    | 2.69     | -2.43                 | -0.88                 | 0.61                  |
| 9. I can be made to laugh easily.                                                     | 65.24<br>(54)    | 2.03     | -2.17                 | -0.97                 | 0.43                  |
| 14. I can easily unwind and enjoy the moment.                                         | 88.92<br>(81)    | 1.13     | -2.20                 | -0.03                 | 1.95                  |
| 16. Everyday life often gives me the occasion to laugh.                               | 59.29<br>(59)    | 1.59     | -2.53                 | -0.89                 | 0.89                  |
| 19. I have a "sunny" nature.                                                          | 65.75<br>(57)    | 2.56     | -1.76                 | -0.66                 | 0.62                  |
| 22. I often smile.                                                                    | 55.36<br>(46)    | 2.78     | -2.32                 | -0.88                 | 0.45                  |
| 25. Laughing has a contagious effect on me.                                           | 61.00<br>(53)    | 1.91     | -2.43                 | -1.05                 | 0.61                  |
| 26. I often find that the small things in everyday life are really funny and amusing. | 62.20<br>(62)    | 1.54     | -2.59                 | -0.73                 | 1.06                  |
| 30. I like to laugh and do it often.                                                  | 65.12<br>(44)    | 2.83     | -2.24                 | -0.97                 | 0.42                  |
| 32. I am a merry person.                                                              | 45.82<br>(45)    | 2.98     | -1.91                 | -0.51                 | 0.95                  |

|                                                                                              |                |      |       |       |       |
|----------------------------------------------------------------------------------------------|----------------|------|-------|-------|-------|
| 35. Many adversities of everyday life actually do have a positive side.                      | 72.63<br>(87)  | 0.76 | -3.63 | -0.85 | 2.34  |
| 38. Many adversities of everyday life actually do have a positive side.                      | 82.36<br>(54)  | 1.66 | -3.21 | -1.64 | 0.18  |
| 41. The good mood of others has a contagious effect on me.                                   | 76.37<br>(64)  | 1.36 | -2.70 | -1.06 | 0.96  |
| 44. I often find the slight mishaps of everyday life amusing, even if they happen to me.     | 117.99<br>(90) | 0.77 | -2.49 | -0.20 | 2.62  |
| 46. I am often in a good mood, even without a specific reason.                               | 59.02<br>(63)  | 1.97 | -1.73 | -0.17 | 1.63  |
| 50. I am often in a joyous mood.                                                             | 40.52<br>(44)  | 3.10 | -1.84 | -0.52 | 1.05  |
| 53. Experience has shown me that the proverb "Laughter is the best medicine" is really true. | 75.89<br>(68)  | 1.49 | -2.32 | -0.90 | 0.61  |
| 57. I like to kid around with others.                                                        | 63.60<br>(54)  | 1.63 | -3.40 | -1.90 | -0.03 |
| 59. It is easy for me to spread good cheer.                                                  | 48.05<br>(56)  | 1.96 | -2.29 | -0.65 | 0.95  |
| Seriousness                                                                                  |                |      |       |       |       |
| 3. I very seldom act without a proper reason.                                                | 144.79<br>(83) | 0.37 | -4.90 | -2.10 | 1.99  |
| 5. Most of my friends are more likely to be serious and reflective                           | 54.34<br>(67)  | 0.79 | -3.97 | -1.94 | 0.60  |
| 7. I prefer conversations that deal with important things and are very profound              | 40.86<br>(53)  | 1.01 | -3.87 | -1.10 | 0.86  |
| 10. I find it unnecessary when people exaggerate in talking to me.                           | 71.49<br>(71)  | 0.68 | -4.47 | -1.69 | 0.66  |
| 12. I plan my actions and make my decisions so that they are useful to me in the long run.   | 55.22<br>(59)  | 1.28 | -2.93 | -1.03 | 0.89  |

|                                                                                                                                                     |                |      |        |       |      |
|-----------------------------------------------------------------------------------------------------------------------------------------------------|----------------|------|--------|-------|------|
| 15. I am a serious person.                                                                                                                          | 39.81<br>(46)  | 1.35 | -3.35  | -1.66 | 0.40 |
| 18. In my life, I like to have everything correct.                                                                                                  | 53.94<br>(54)  | 0.85 | -4.41  | -2.27 | 0.33 |
| 20. When I watch TV, I prefer informative reports to "shallow" programs.                                                                            | 111.93<br>(83) | 0.49 | -3.19  | 0.37  | 3.05 |
| 23. In everything I do, I always consider every possible effect and compare all pros and cons carefully.                                            | 61.00<br>(55)  | 1.49 | -2.67  | -1.00 | 0.82 |
| 28. In most situations, I initially see the serious aspect.                                                                                         | 55.82<br>(60)  | 1.18 | -2.74  | -0.68 | 1.48 |
| 33. When I am in contact with others, I often find that I have thought many things through more thoroughly than they.                               | 65.02<br>(61)  | 1.13 | -3.13  | -1.01 | 0.84 |
| 36. In conversation, I always avoid exaggerations, embellishments, and ambiguities, all of which do not contribute to the meaning of my statements. | 80.32<br>(75)  | 0.64 | -3.704 | -0.73 | 1.93 |
| 39. My everyday life is filled mainly with important things and matters.                                                                            | 54.65<br>(56)  | 1.11 | -3.38  | -0.52 | 1.92 |
| 42. I don't understand how others can waste their time on senseless matters.                                                                        | 81.55<br>(75)  | 0.96 | -2.18  | -0.34 | 1.25 |
| 47. I tend to plan far in advance and to set long-term goals for myself.                                                                            | 75.10<br>(69)  | 1.09 | -2.35  | -0.52 | 1.05 |
| 49. Even seemingly trivial things have to be treated seriously and responsibly.                                                                     | 59.69<br>(67)  | 1.11 | -2.36  | -0.39 | 1.91 |
| 52. I try to spend my free time doing things as useful as possible.                                                                                 | 74.36<br>(66)  | 0.95 | -3.09  | -0.79 | 1.64 |
| 55. I prefer people who communicate with deliberation and objectivity.                                                                              | 60.07<br>(47)  | 1.45 | -3.29  | -1.54 | 0.44 |

|                                                                                                             |                |      |       |       |      |
|-------------------------------------------------------------------------------------------------------------|----------------|------|-------|-------|------|
| 58. When I communicate with other people, I always try to have an objective and sober exchange of ideas.    | 47.58<br>(46)  | 1.71 | -2.96 | -1.24 | 0.75 |
| 60. One of my principles is: "first work, then play."                                                       | 68.50<br>(69)  | 1.11 | -2.36 | -0.54 | 1.16 |
| Bad Mood                                                                                                    |                |      |       |       |      |
| 1. People often have reason to ask if something is eating me.                                               | 75.93<br>(93)  | 1.00 | -1.10 | 0.86  | 2.83 |
| 6. Some annoying circumstances are capable of spoiling my mood for quite a while.                           | 72.65<br>(81)  | 1.22 | -2.48 | -0.55 | 1.03 |
| 8. Sometimes I have the feeling of an inner emptiness.                                                      | 120.53<br>(88) | 1.42 | -1.15 | 0.10  | 1.25 |
| 11. Compared to others, I really can be grumpy and grouchy.                                                 | 89.71<br>(99)  | 0.98 | -1.07 | 0.57  | 2.53 |
| 13. I often feel despondent.                                                                                | 89.66<br>(73)  | 2.02 | -1.05 | 0.28  | 1.58 |
| 17. I often think, "For heaven's sake, don't bother me today."                                              | 88.13<br>(99)  | 1.00 | -1.42 | 0.49  | 1.93 |
| 21. When I am distressed, even a very funny thing fails to cheer me up.                                     | 83.12<br>(101) | 0.86 | -2.07 | 0.35  | 2.23 |
| 24. When friends try to cheer me up by joking or fooling around, I sometimes become more morose and grumpy. | 71.99<br>(74)  | 1.10 | -0.08 | 1.56  | 3.27 |
| 27. There are many days on which I think, "I got up on the wrong side of bed."                              | 65.03<br>(87)  | 1.50 | -0.83 | 0.58  | 1.74 |
| 29. Sometimes I am sad without any reason.                                                                  | 81.38<br>(79)  | 1.86 | -0.88 | 0.21  | 1.29 |
| 31. My mood is often not the best one.                                                                      | 63.35<br>(61)  | 2.64 | -0.95 | 0.41  | 1.47 |
| 34. Even if there is no reason, I often feel ill-humored.                                                   | 53.24<br>(49)  | 3.53 | -0.24 | 0.78  | 1.53 |

|                                                                           |               |      |       |       |      |
|---------------------------------------------------------------------------|---------------|------|-------|-------|------|
| 37. I am often in a bad mood.                                             | 49.36<br>(44) | 3.82 | -0.19 | 0.92  | 1.72 |
| 40. Sometimes I am distressed for a very long time.                       | 52.89<br>(65) | 2.33 | -0.44 | 0.68  | 1.67 |
| 43. I am often sullen.                                                    | 52.49<br>(61) | 1.78 | -0.28 | 1.13  | 2.57 |
| 45. My acquaintances often get on my nerves.                              | 62.72<br>(84) | 1.22 | -0.81 | 1.00  | 2.71 |
| 48. I often feel so gloomy that nothing can make me laugh.                | 44.99<br>(51) | 2.58 | 0.18  | 1.267 | 2.18 |
| 51. If I am in a bad mood, I can't stand the presence of cheerful people. | 81.37<br>(95) | 1.04 | -0.72 | 1.15  | 2.70 |
| 54. I am a rather sad person.                                             | 40.67<br>(47) | 2.76 | 0.13  | 1.28  | 2.20 |
| 56. I often feel so weary that I cannot rouse myself to do anything.      | 83.55<br>(96) | 1.18 | -1.20 | 0.38  | 2.03 |

*Note.* Number indicates item position in the paper-pencil parent form (STCI-T60). Fit was calculated under Samejima's Graded

Response Model. Due to the large sample size  $\alpha$  was fixed at .001 for S- $X^2$ .  $a$  = item discrimination parameter,  $b$  = category threshold parameter.
