# Supplementary material
Source: publisher figshare collection journal article supplement (https://sage.figshare.com/ndownloader/files/17890163)
Supplement: Supplementary file 5 [file 17890163]

| Correlations              |                     |                     |                           |                       |                         |            |                   |           |
|---------------------------|---------------------|---------------------|---------------------------|-----------------------|-------------------------|------------|-------------------|-----------|
|                           |                     | T60_CheerLong_Added | T60_SeriousnessLong_Added | T60_BadMoodLong_Added | CD_RISCTotalrevisedby10 | Lotdivded6 | PSS_total_revised | OMS_total |
| T60_CheerLong_Added       | Pearson Correlation | 1                   | .036                      | -.532**               | .489**                  | .441**     | -.368**           | .452**    |
|                           | Sig. (2-tailed)     |                     | .356                      | .000                  | .000                    | .000       | .000              | .000      |
|                           | N                   | 681                 | 677                       | 681                   | 681                     | 681        | 681               | 681       |
| T60_SeriousnessLong_Added | Pearson Correlation | .036                | 1                         | .055                  | .282**                  | .006       | -.037             | .098*     |
|                           | Sig. (2-tailed)     | .356                |                           | .155                  | .000                    | .875       | .342              | .011      |
|                           | N                   | 677                 | 678                       | 678                   | 678                     | 677        | 678               | 678       |
| T60_BadMoodLong_Added     | Pearson Correlation | -.532**             | .055                      | 1                     | -.449**                 | -.556**    | .586**            | -.511**   |
|                           | Sig. (2-tailed)     | .000                | .155                      |                       | .000                    | .000       | .000              | .000      |
|                           | N                   | 681                 | 678                       | 682                   | 682                     | 681        | 682               | 682       |
| CD_RISCTotalrevisedby10   | Pearson Correlation | .489**              | .282**                    | -.449**               | 1                       | .482**     | -.462**           | .404**    |
|                           | Sig. (2-tailed)     | .000                | .000                      | .000                  |                         | .000       | .000              | .000      |
|                           | N                   | 681                 | 678                       | 682                   | 683                     | 682        | 683               | 683       |
| Lotdivded6                | Pearson Correlation | .441**              | .006                      | -.556**               | .482**                  | 1          | -.497**           | .459**    |
|                           | Sig. (2-tailed)     | .000                | .875                      | .000                  | .000                    |            | .000              | .000      |
|                           | N                   | 681                 | 677                       | 681                   | 682                     | 682        | 682               | 682       |
| PSS_total_revised         | Pearson Correlation | -.368**             | -.037                     | .586**                | -.462**                 | -.497**    | 1                 | -.604**   |
|                           | Sig. (2-tailed)     | .000                | .342                      | .000                  | .000                    | .000       |                   | .000      |
|                           | N                   | 681                 | 678                       | 682                   | 683                     | 682        | 683               | 683       |
| OMS_total                 | Pearson Correlation | .452**              | .098*                     | -.511**               | .404**                  | .459**     | -.604**           | 1         |
|                           | Sig. (2-tailed)     | .000                | .011                      | .000                  | .000                    | .000       | .000              |           |
|                           | N                   | 681                 | 678                       | 682                   | 683                     | 682        | 683               | 683       |

\*\* Correlation is significant at the 0.01 level (2-tailed).

| Correlations              |                     |                     |                           |                       |       |         |         |         |        |        |
|---------------------------|---------------------|---------------------|---------------------------|-----------------------|-------|---------|---------|---------|--------|--------|
|                           |                     | T60_CheerLong_Added | T60_SeriousnessLong_Added | T60_BadMoodLong_Added | Q05_H | Q06_E   | Q07_X   | Q08_A   | Q09_C  | Q10_O  |
| T60_CheerLong_Added       | Pearson Correlation | 1                   | .036                      | -.532**               | .018  | -.276** | .635**  | .176    | .029   | .102   |
|                           | Sig. (2-tailed)     |                     | .356                      | .000                  | .857  | .005    | .000    | .074    | .767   | .301   |
|                           | N                   | 681                 | 677                       | 681                   | 104   | 104     | 104     | 104     | 104    | 104    |
| T60_SeriousnessLong_Added | Pearson Correlation | .036                | 1                         | .055                  | -.019 | .010    | -.035   | -.004   | .393** | .352** |
|                           | Sig. (2-tailed)     | .356                |                           | .155                  | .849  | .921    | .725    | .968    | .000   | .000   |
|                           | N                   | 677                 | 678                       | 678                   | 104   | 104     | 104     | 104     | 104    | 104    |
| T60_BadMoodLong_Added     | Pearson Correlation | -.532**             | .055                      | 1                     | -.124 | .430**  | -.473** | -.312** | -.183  | -.134  |
|                           | Sig. (2-tailed)     | .000                | .155                      |                       | .210  | .000    | .000    | .001    | .064   | .175   |
|                           | N                   | 681                 | 678                       | 682                   | 104   | 104     | 104     | 104     | 104    | 104    |
| Q05_H                     | Pearson Correlation | .018                | -.019                     | -.124                 | 1     | .110    | .004    | .182*   | .063   | .090   |
|                           | Sig. (2-tailed)     | .857                | .849                      | .210                  |       | .219    | .961    | .040    | .483   | .315   |
|                           | N                   | 104                 | 104                       | 104                   | 127   | 127     | 127     | 127     | 127    | 127    |
| Q06_E                     | Pearson Correlation | -.276**             | .010                      | .430**                | .110  | 1       | -.268** | -.145   | .024   | -.088  |
|                           | Sig. (2-tailed)     | .005                | .921                      | .000                  | .219  |         | .002    | .103    | .791   | .325   |
|                           | N                   | 104                 | 104                       | 104                   | 127   | 127     | 127     | 127     | 127    | 127    |
| Q07_X                     | Pearson Correlation | .635**              | -.035                     | -.473**               | .004  | -.268** | 1       | .084    | .207*  | .122   |
|                           | Sig. (2-tailed)     | .000                | .725                      | .000                  | .961  | .002    |         | .349    | .019   | .172   |
|                           | N                   | 104                 | 104                       | 104                   | 127   | 127     | 127     | 127     | 127    | 127    |
| Q08_A                     | Pearson Correlation | .176                | -.004                     | -.312**               | .182* | -.145   | .084    | 1       | .128   | .025   |
|                           | Sig. (2-tailed)     | .074                | .968                      | .001                  | .040  | .103    | .349    |         | .153   | .781   |
|                           | N                   | 104                 | 104                       | 104                   | 127   | 127     | 127     | 127     | 127    | 127    |
| Q09_C                     | Pearson Correlation | .029                | .393**                    | -.183                 | .063  | .024    | .207*   | .128    | 1      | .139   |
|                           | Sig. (2-tailed)     | .767                | .000                      | .064                  | .483  | .791    | .019    | .153    |        | .118   |
|                           | N                   | 104                 | 104                       | 104                   | 127   | 127     | 127     | 127     | 127    | 127    |
| Q10_O                     | Pearson Correlation | .102                | .352**                    | -.134                 | .090  | -.088   | .122    | .025    | .139   | 1      |
|                           | Sig. (2-tailed)     | .301                | .000                      | .175                  | .315  | .325    | .172    | .781    | .118   |        |
|                           | N                   | 104                 | 104                       | 104                   | 127   | 127     | 127     | 127     | 127    | 127    |

\*\* Correlation is significant at the 0.01 level (2-tailed).
